# Supplementary material
Source: bioRxiv or medRxiv preprint supplement (https://www.biorxiv.org/highwire/filestream/126533/field_highwire_adjunct_files/0/420109-1.pdf)
Supplement: Supplementary file [file 420109-1.pdf]

## Supplementary Figure 1.

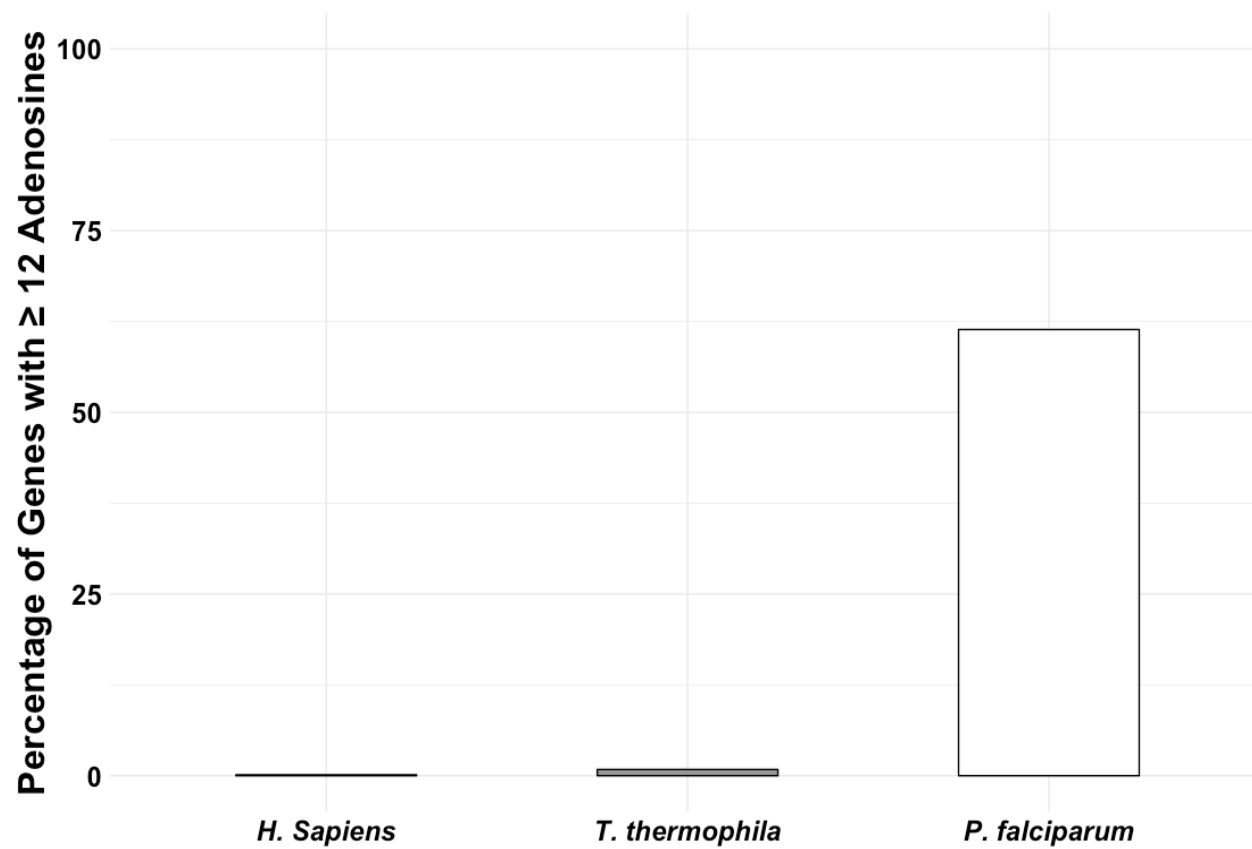

**Supplementary Figure 1.** Percentage of genes with  $\geq 12$  consecutive adenosine nucleotides for each organism. Number of genes was calculated as percentage of total number of genes with  $\geq 12$  consecutive adenosine nucleotides over total number of genes for each organism.

## Supplementary Figure 2.

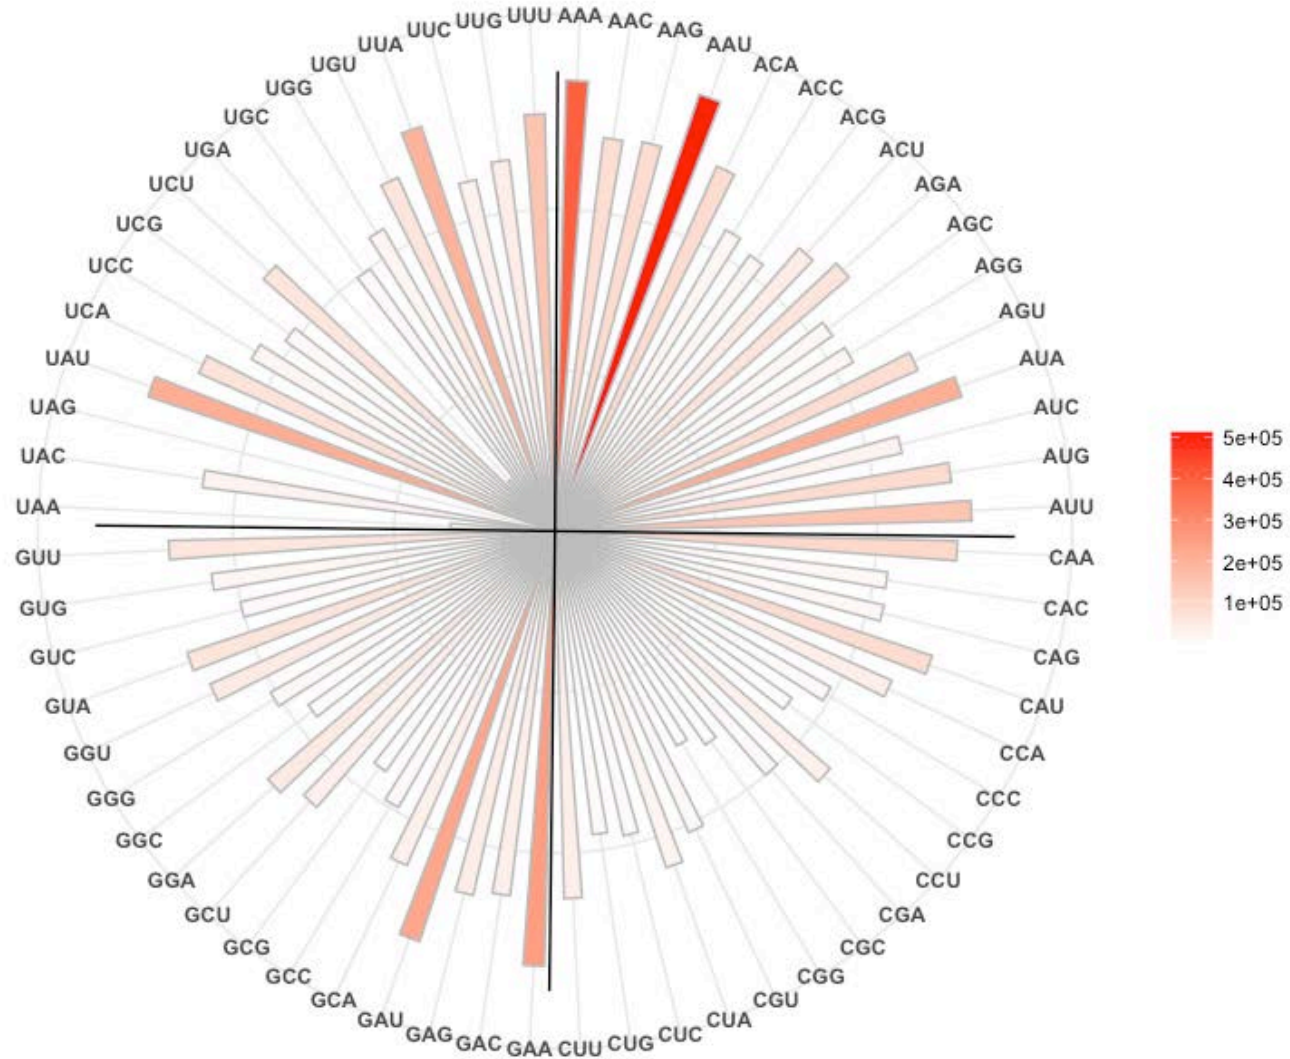

### *P. falciparum* Absolute Codon Counts ( $\log_{10}$ )

**Supplementary Figure 2.** Absolute codon usage counts in *P. falciparum* as per Saul and Battistutta 1988 on log10 scale. Lysine AAA and asparagine (AAU) codons show extreme bias over their cognate codons.

## Supplementary Table1.

| ID         | Name                                 | Bgd count | Result count | Pct of bgd | Fold enrichment | Odds ratio | P-value    | Benjamini  | Bonferroni |
|------------|--------------------------------------|-----------|--------------|------------|-----------------|------------|------------|------------|------------|
| GO:0016337 | single organismal cell-cell adhesion | 57        | 56           | 98,2       | 1,56            | 33,76      | 8,98E-11   | 6,69E-08   | 1,34E-07   |
| GO:0098602 | single organism cell adhesion        | 57        | 56           | 98,2       | 1,56            | 33,76      | 8,98E-11   | 6,69E-08   | 1,34E-07   |
| GO:0007155 | cell adhesion                        | 77        | 71           | 92,2       | 1,47            | 7,15       | 2,66E-09   | 1,32E-06   | 3,97E-06   |
| GO:0009405 | pathogenesis                         | 101       | 81           | 80,2       | 1,28            | 2,44       | 0,00010834 | 0,04035608 | 0,16142433 |

**Supplementary Table 1.** Highly significant gene ontology terms (GO) from biological process category for polyA-track carrying genes in *Plasmodium falciparum*.

### Supplementary Figure 3.

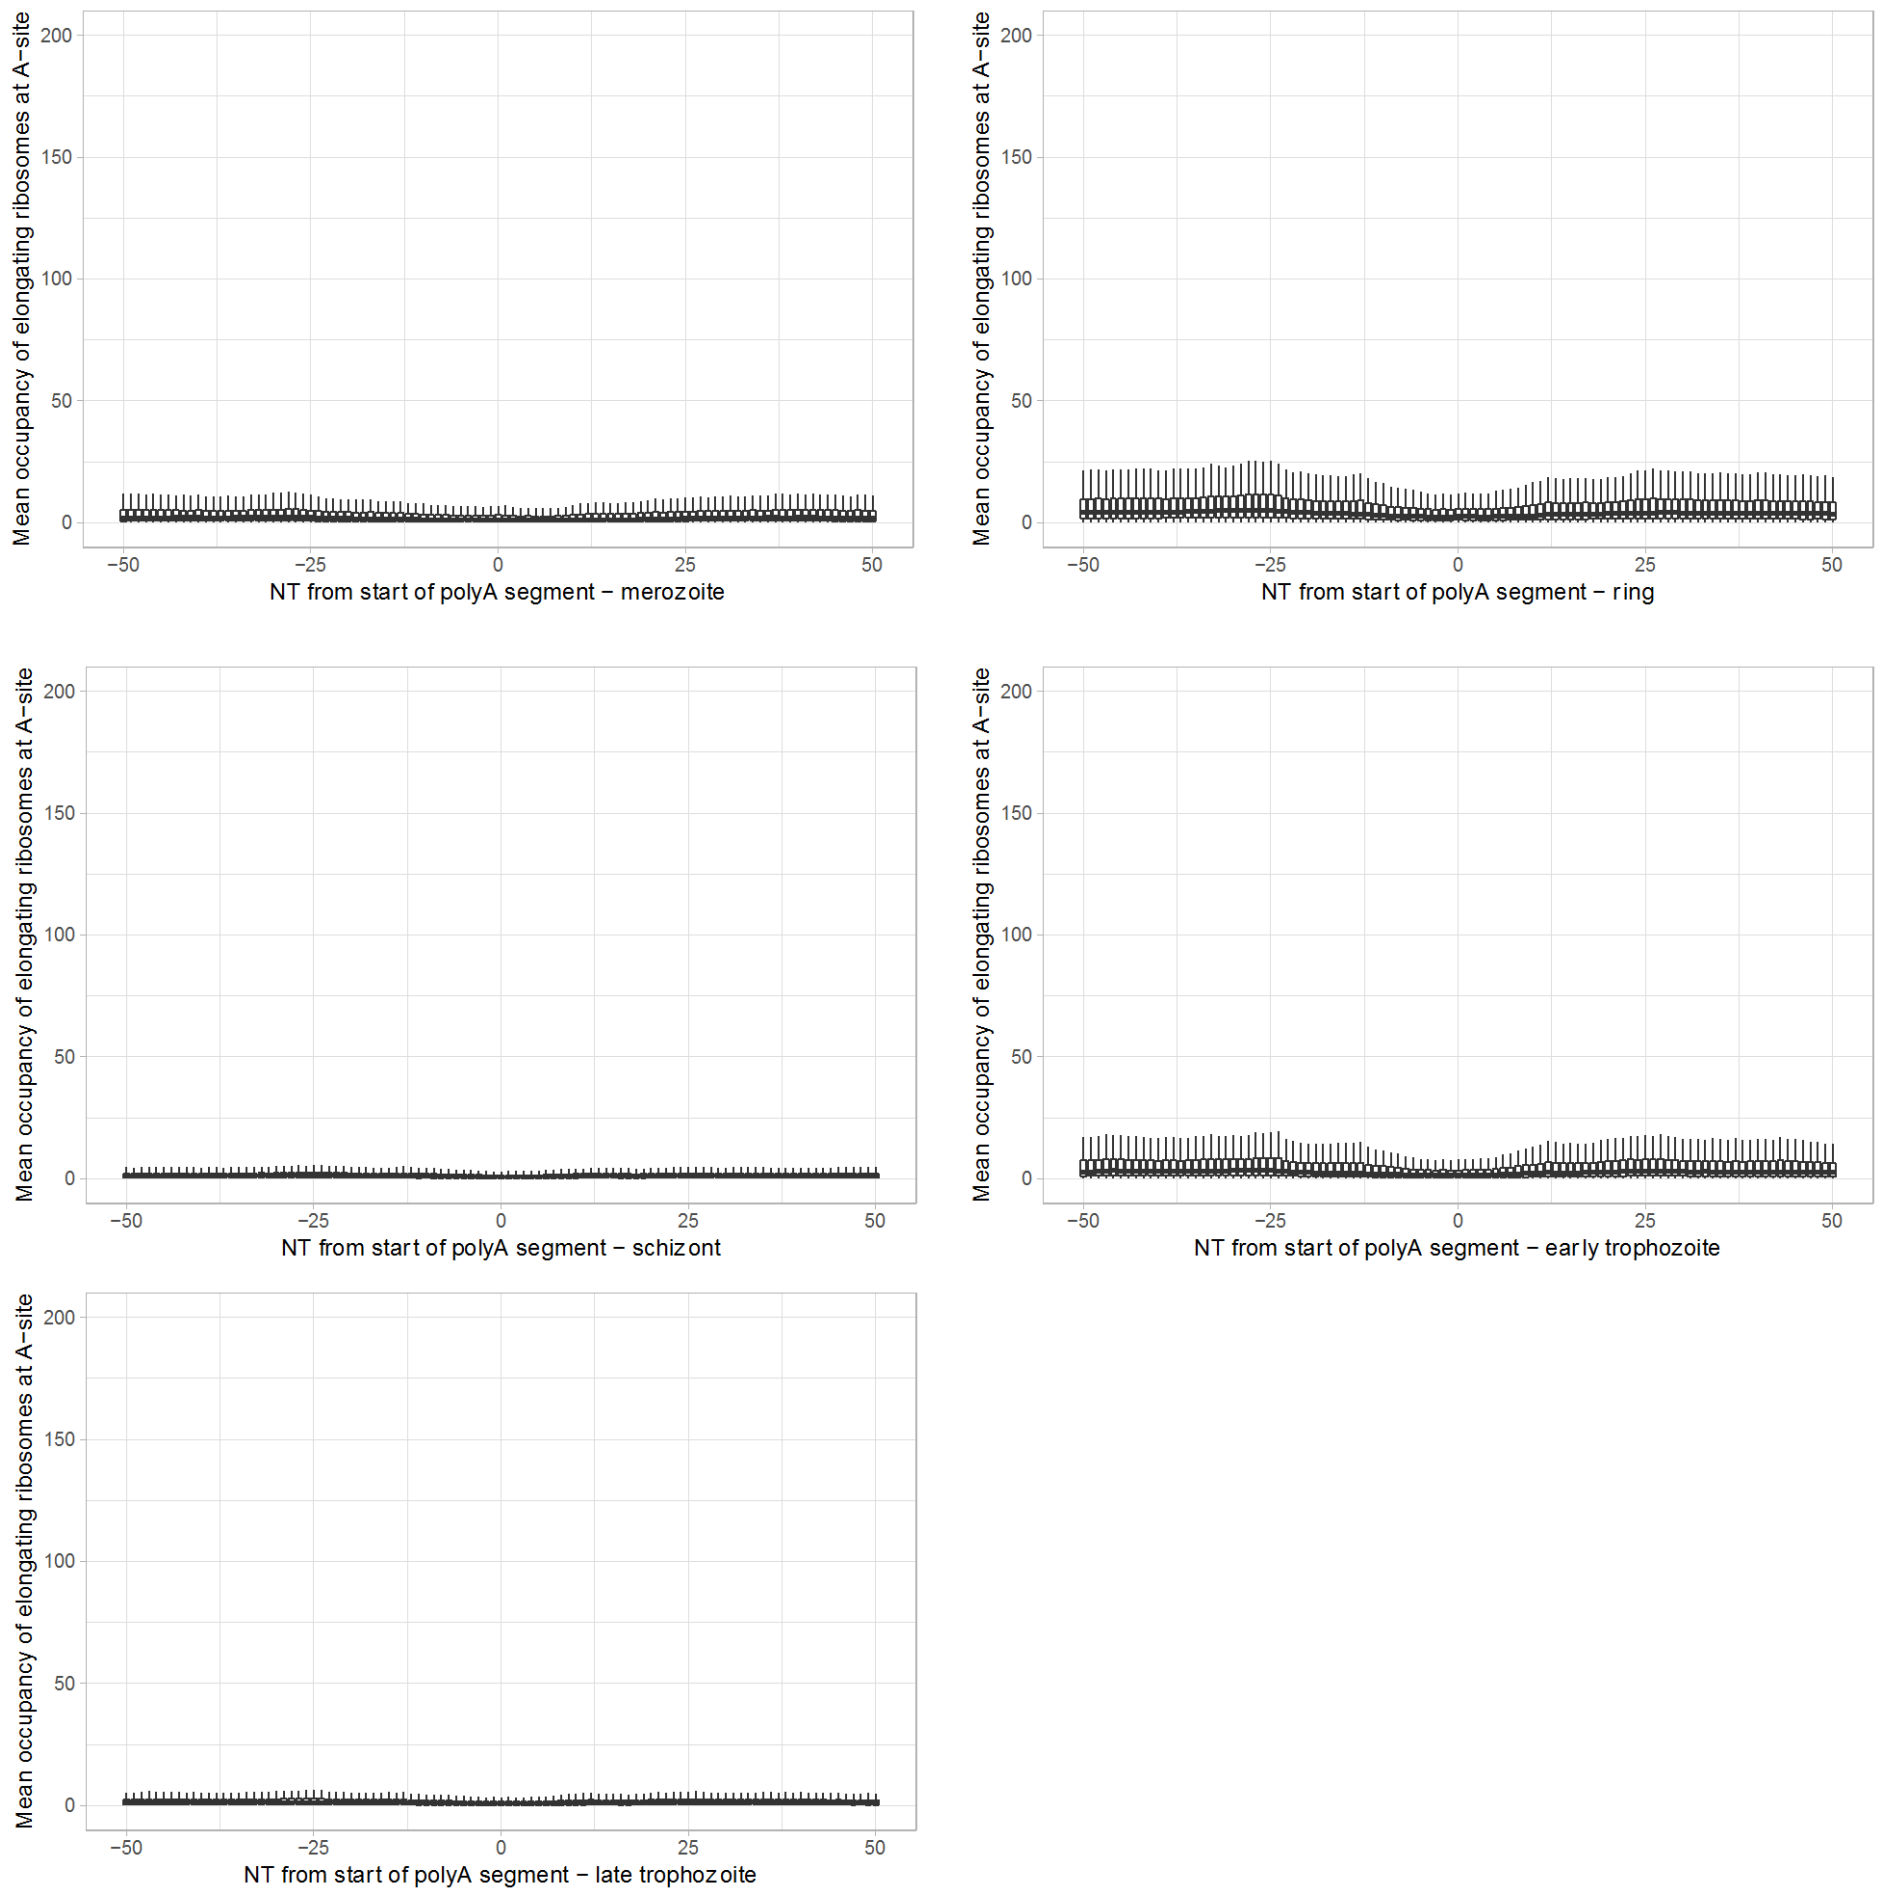

**Supplementary Figure 3.** Occupancy of elongating ribosomes (mapped to A-site) around start of polyA segment in *Plasmodium* at different life stages. Scale preserved from the main figures. In all cases, to avoid inclusion of sparsely mapped segments, regions with average occupancy below the mean for the particular dataset were excluded. Gene with segments shorter than 22 adenosine nucleotides were taken into account.

## Supplementary Figure 4.

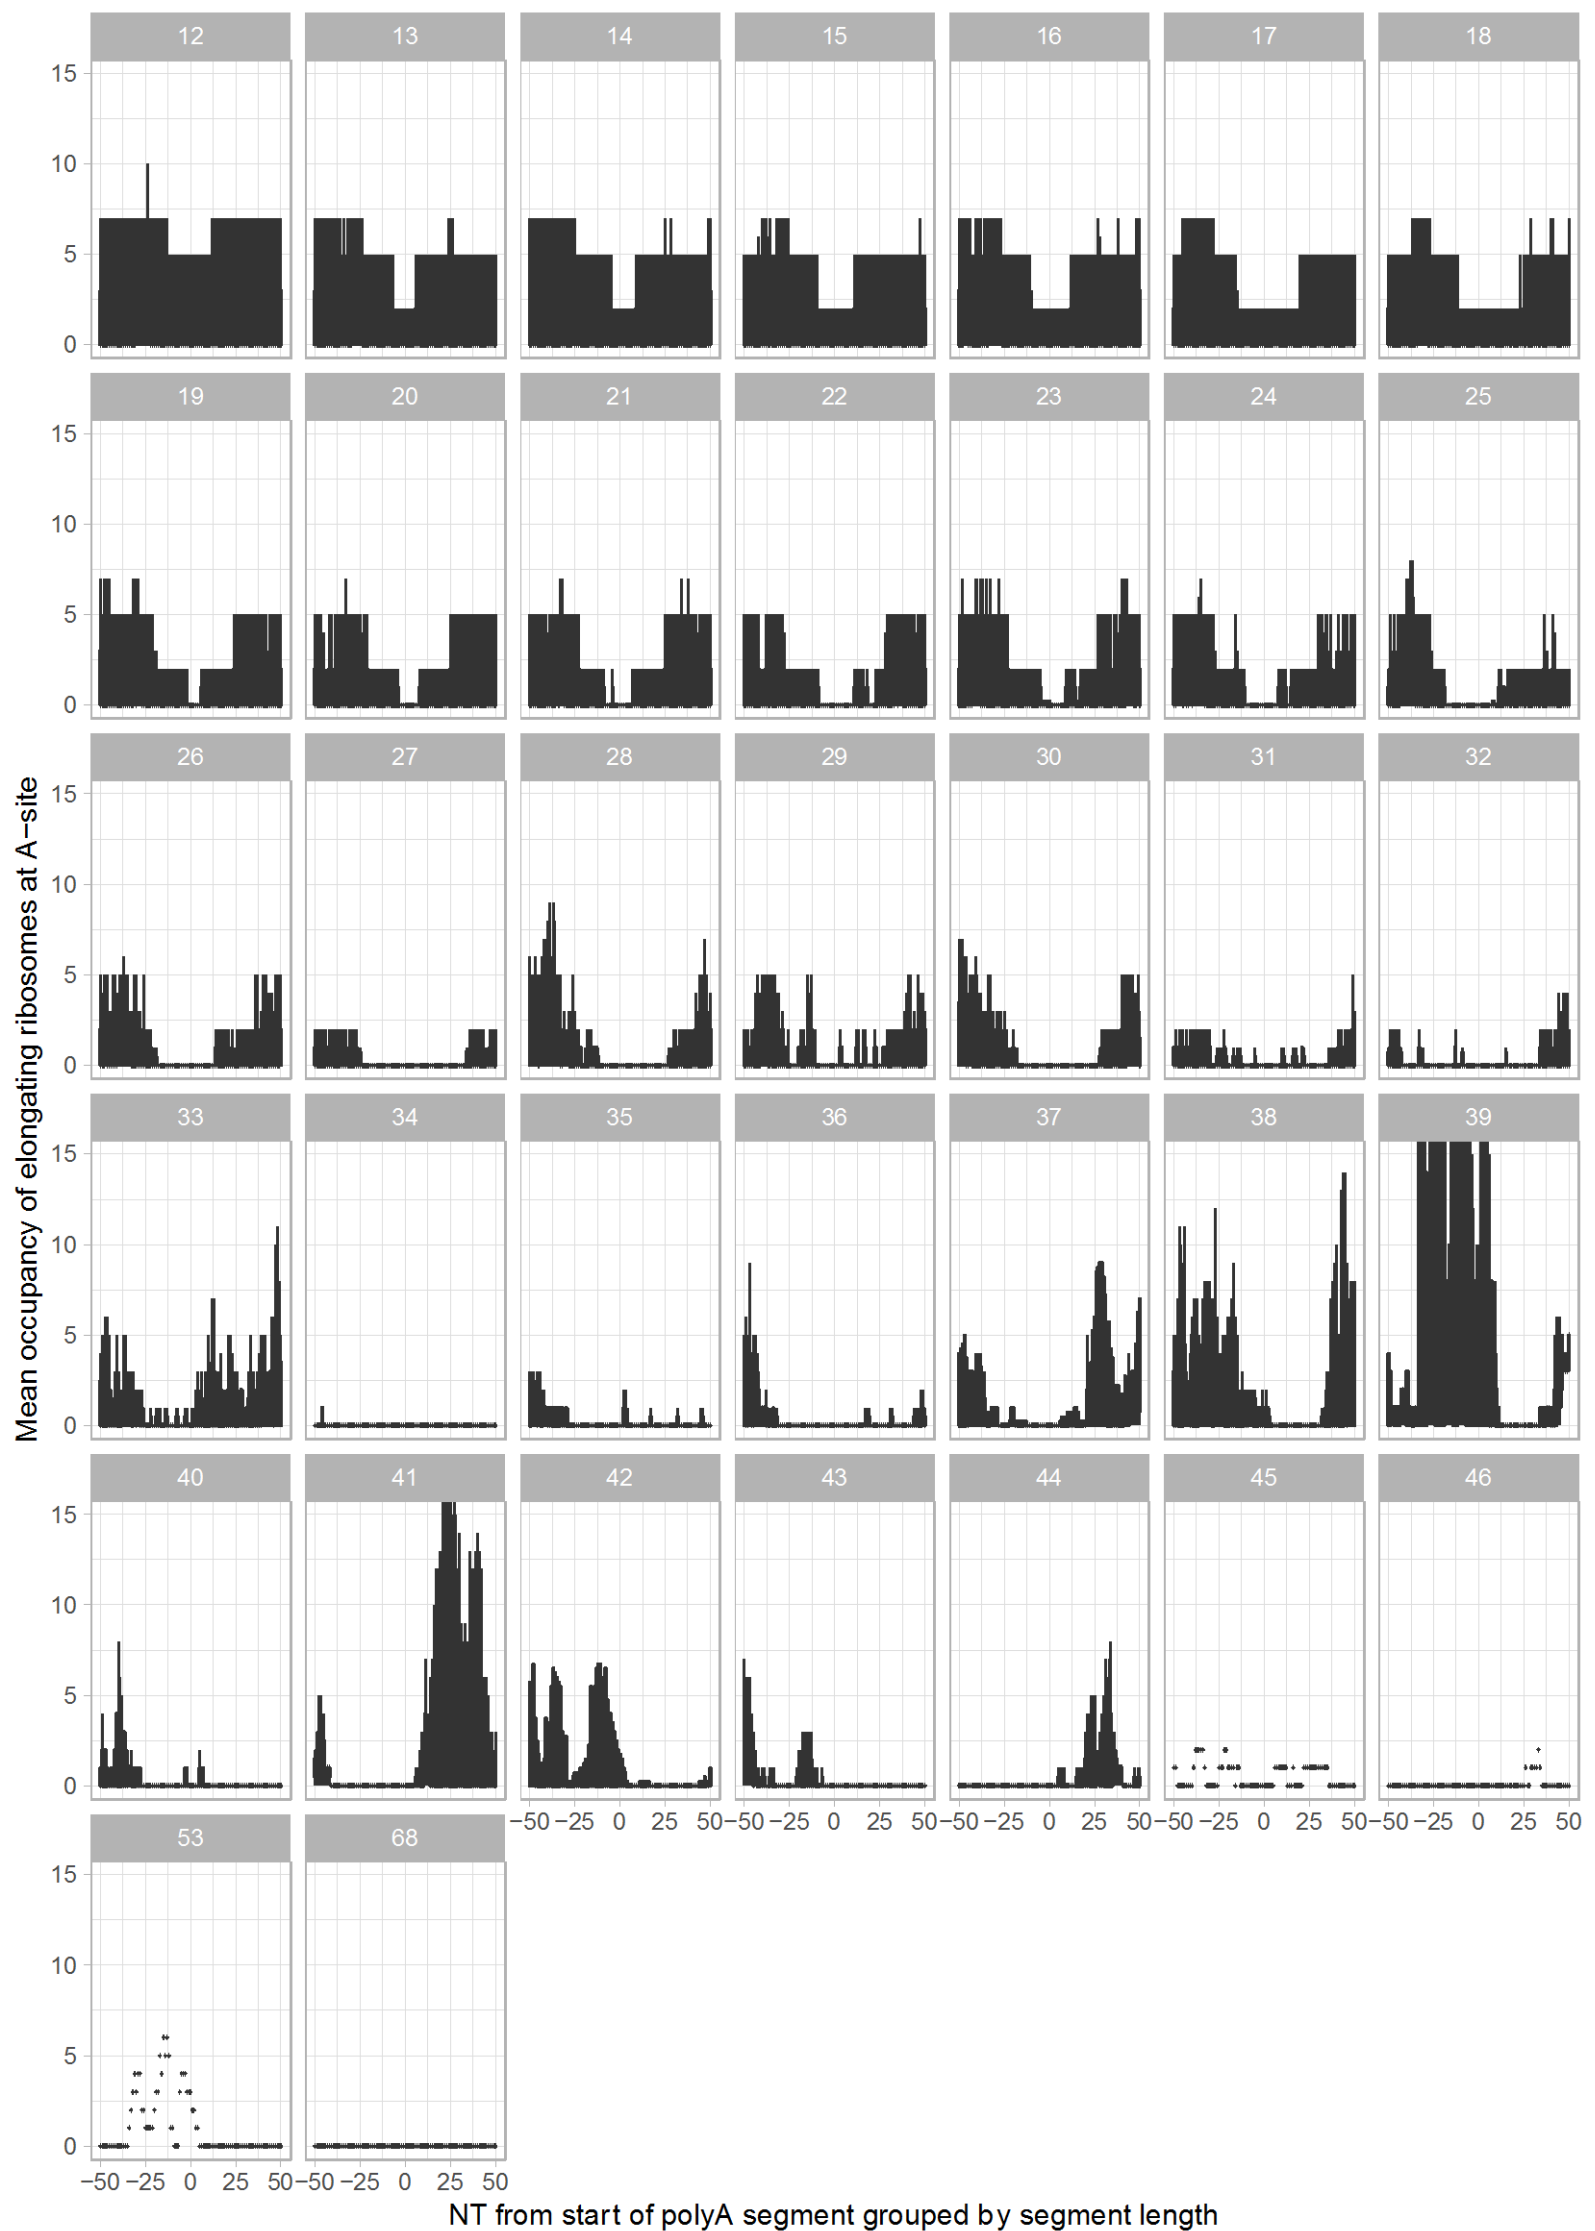

**Supplementary Figure 4.** Occupancy around polyA segment length (summarized across all life stages) grouped by polyA segment length (12-68 adenosine nucleotides in a row genes are shown).

## Supplementary Figure 5.

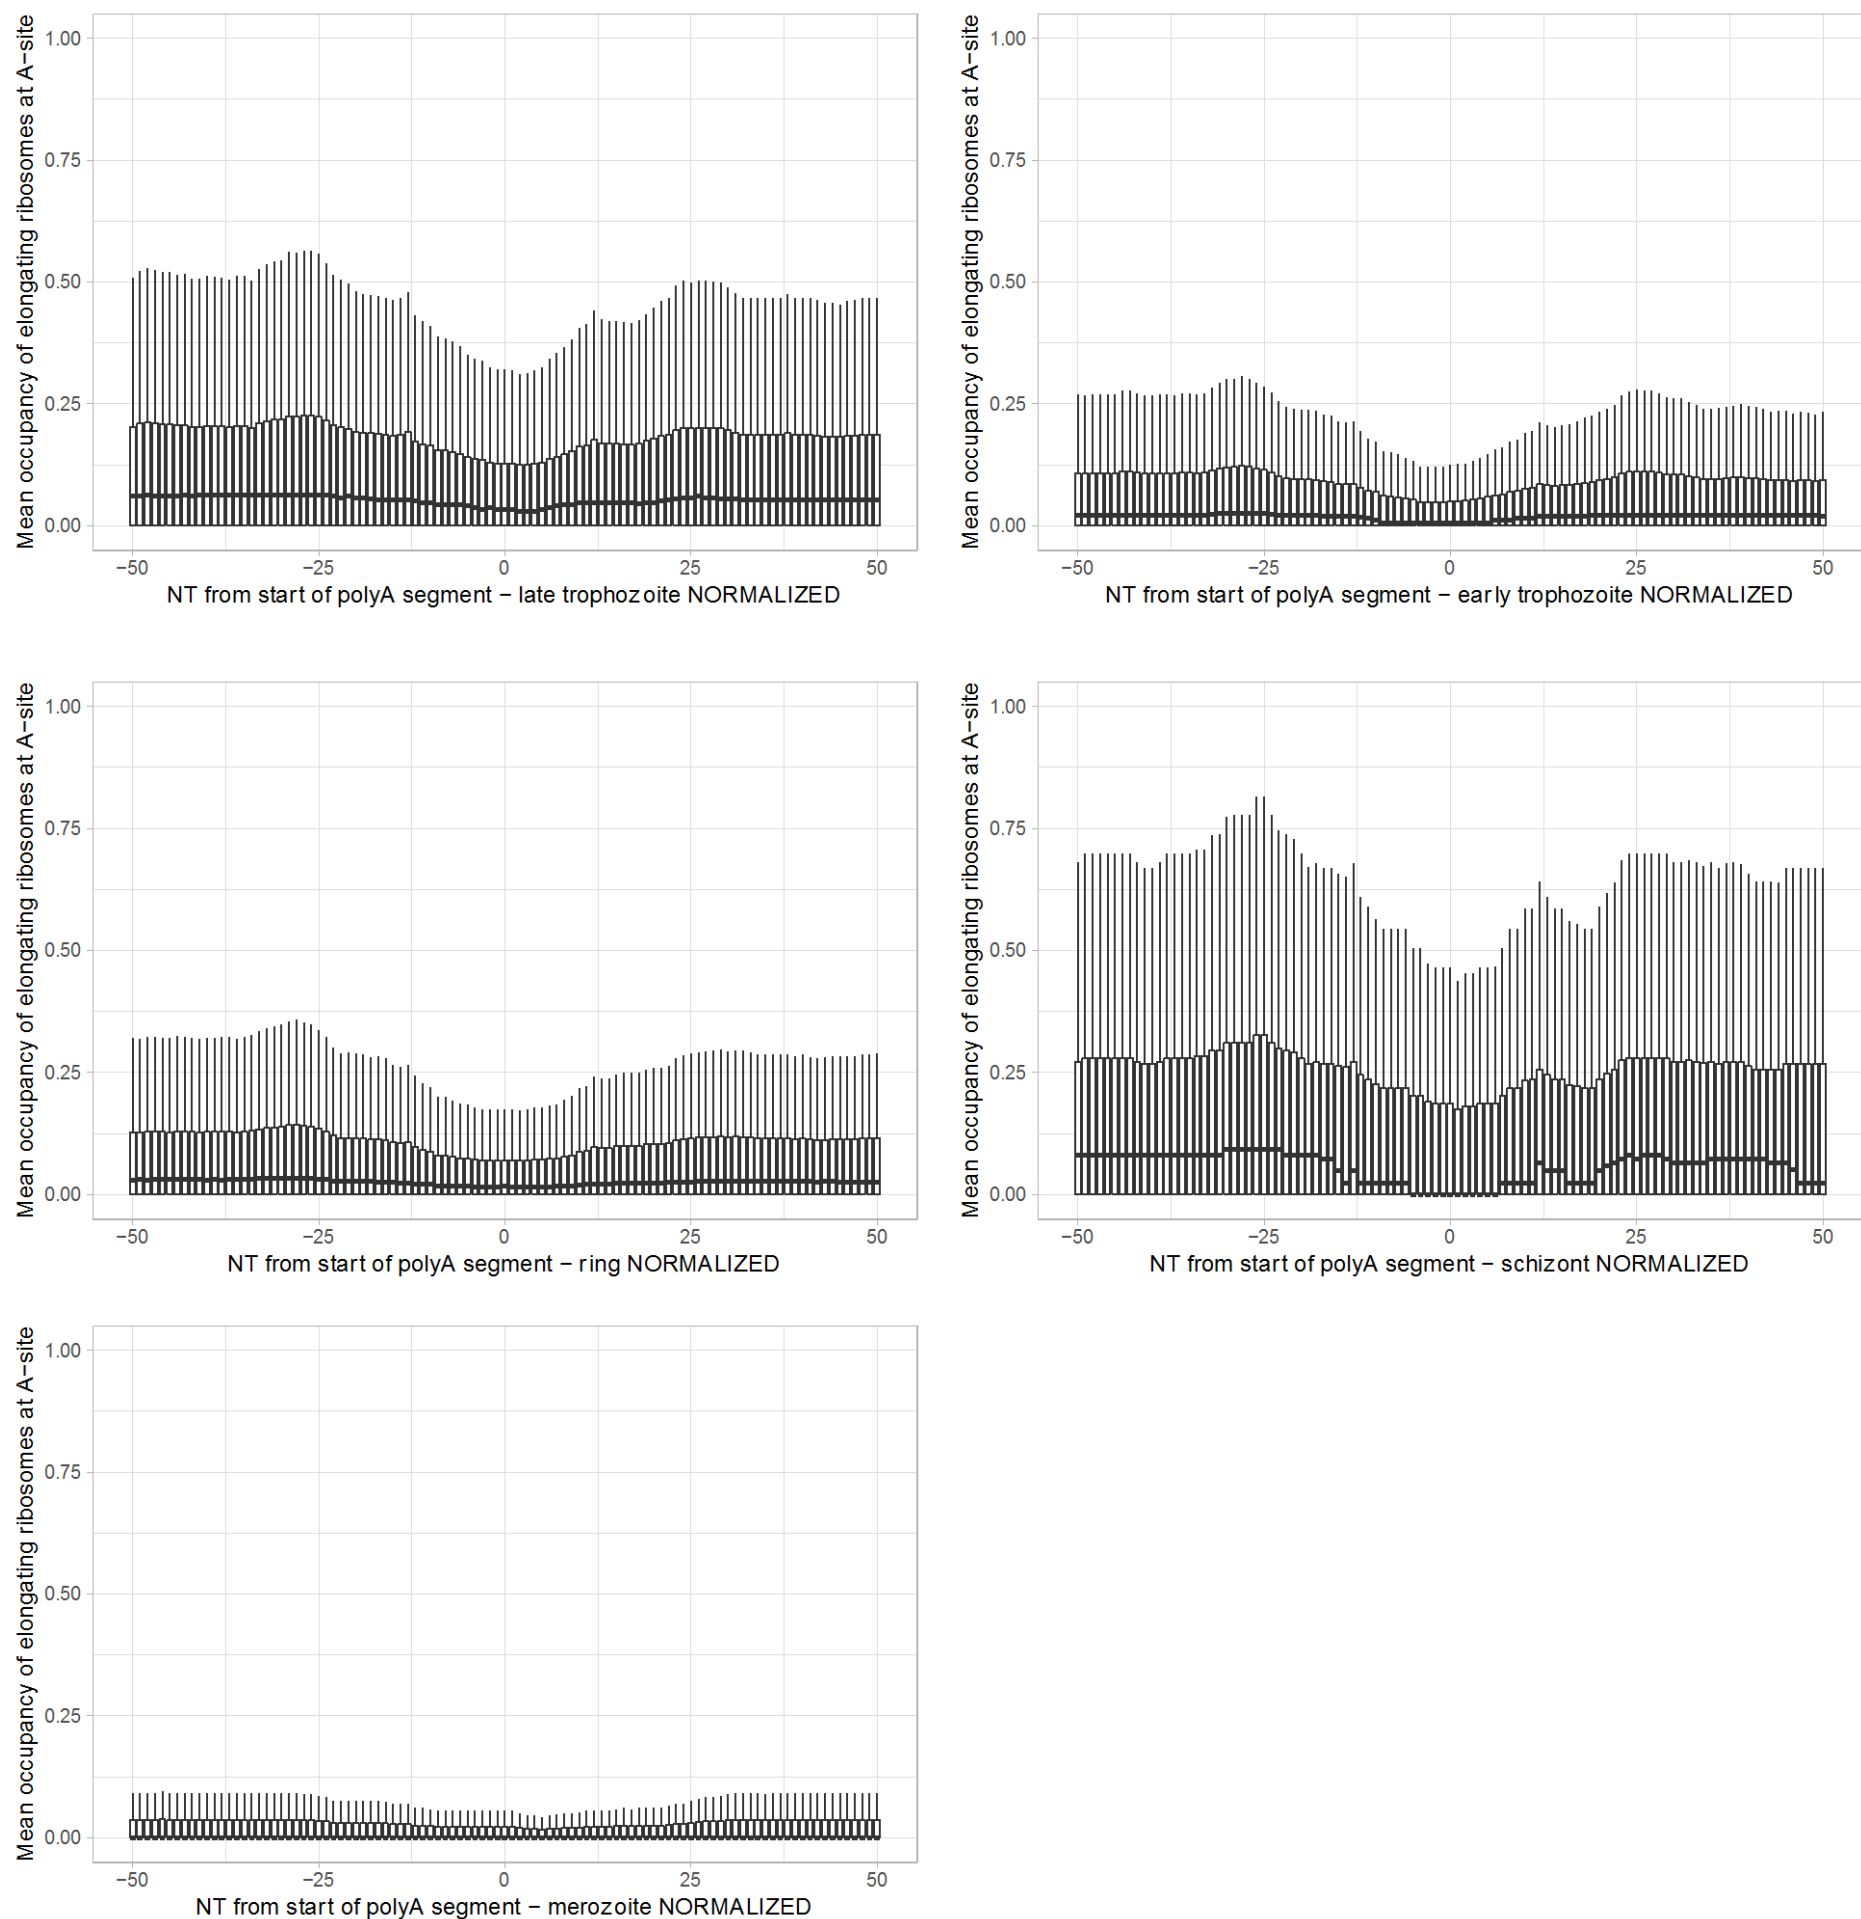

**Supplementary Figure 5.** Occupancy of elongating ribosomes (mapped to A-site) around start of polyA segment in *Plasmodium* at different life stages. Scale preserved from the main figures. In all cases, to avoid inclusion of sparsely mapped segments, regions with average occupancy below the mean for the particular dataset were excluded. Genes with segments shorter than 22 adenosine nucleotides were taken into account. In all cases data were normalized by dividing by a mean occupancy of a randomly selected gene segments equally numbered as polyA set from the same dataset.

## Supplementary Figure 6.

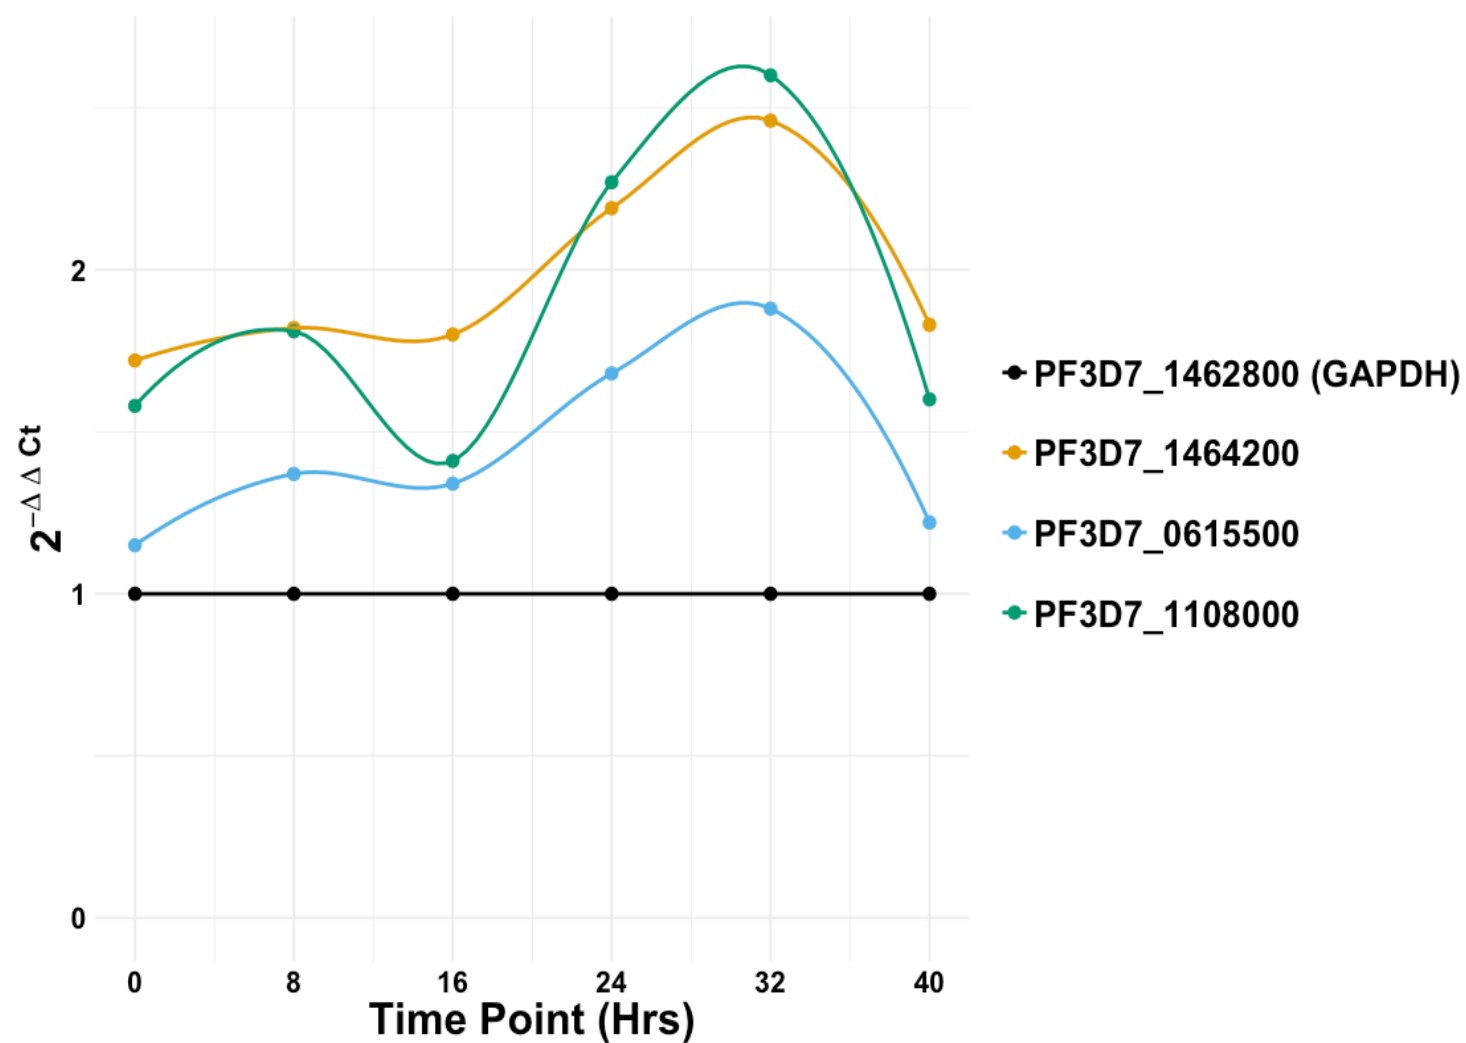

**Supplementary Figure 6.** Time course mRNA expression analysis of three genes (PF3D7\_1464200, PF3D7\_0615500, PF3D7\_1108000) containing polyA stretches of varying lengths (largest: 20, 21, and 31 adenosines respectively) normalized to GAPDH (PF3D7\_1462800) starting with highly synchronized rings at time zero.  $2^{-\Delta\Delta Ct}$  values represent mRNA abundance enrichment of genes with polyA stretches over *Pf*GAPDH mRNA levels.

## Supplementary Figure 7.

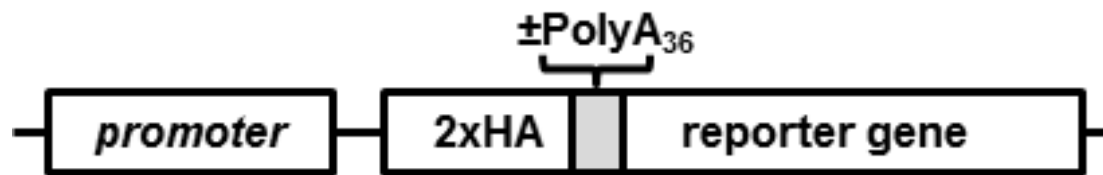

**Supplementary Figure 7.** Generalized scheme of reporter constructs used for expression in *H. sapiens*, *T. thermophila*, and *P. falciparum*.



## Supplementary Figure 8.

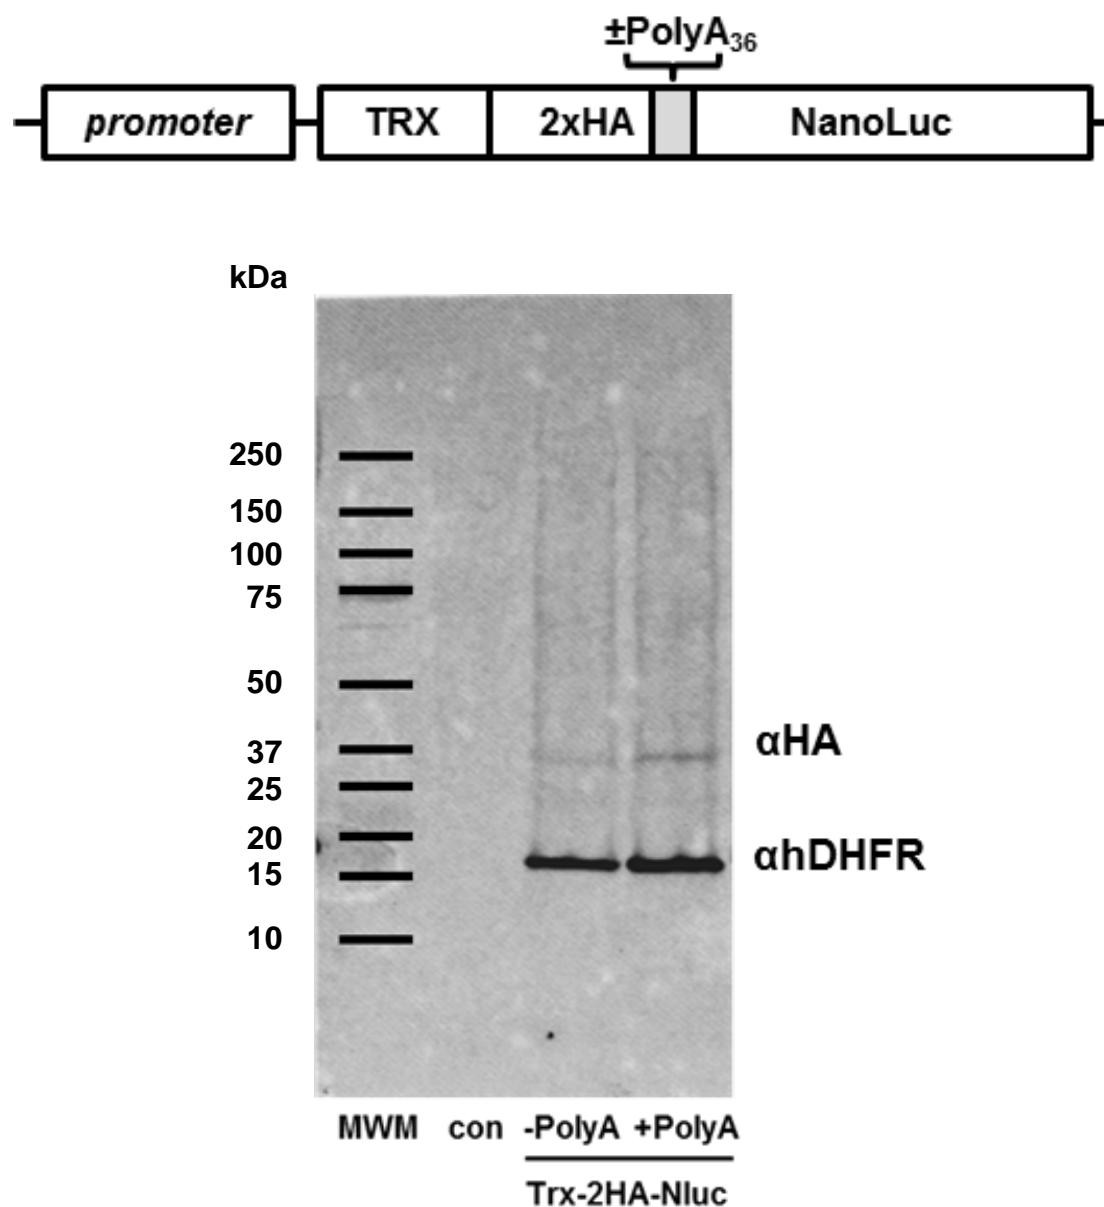

**Supplementary Figure 8.** Generalized schematic of Thioredoxin fusion NanoLuc reporter construct used for episomal expression in *P. falciparum* cells (Trx-2HA-Nluc). Lower: Western blot analysis of Trx-2HA-Nluc reporter expression in *P. falciparum* without (-polyA36) and with 36 adenosine stretch (+polyA36). Human DHFR (hDHFR) expressed from the same plasmid is used as loading and transfection control. Untransfected *P. falciparum* control cells (con) and Biorad Precision Plus Protein™ molecular weight markers (MWM) are indicated.

## Supplementary Figure 9.

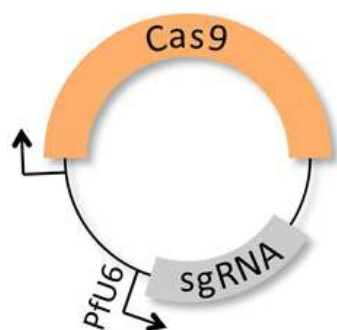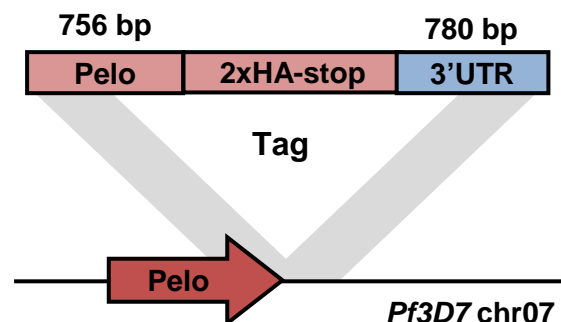

ATGAAGTTGTTATACAGAAAAGCGTGATAACGATAAGATGATTATCGGTTTAATTACGGAA  
 GAGGATGATGATTTGTGGGAGTGTATAATTTGTTAAGTTTAAATGATGAAATAGAATCT  
 TATACTTCAAGAAAGGTTCAAAAAGATATTGGTAATAATTCATATGTAAGTAAATAAGA  
 AAGTTGATGTTAACATTGTGTATTACTAAAATTGATTTTGGATTGTGAGAATAATAGTTTA  
 AGAGTATCAGGGAAAAATGTCAAAGCAAATGAGTATGTTAAGATTGGTCAGTATCATACT  
 TTTGATATAGGTCTTAATGATAAGATAAAAAATTATGAAAAAGAAGTGGGATCATATACAT  
 AGAGAAAAATTAGAAGAATGTACTAATAATAAAGAATAATTGTGAAATTGCTATTTTATTA  
 ATTGATTGTGGTCGTGCTAATATGTATTTACTTACA**CAACAATTATATAAAAACAGTTTTT**  
**AGTATTAATAAAGATAAATACATAAAGAAAAAGATAAAAAATAATTCATCGTCATATAAAAAA**  
**TCATTAGAGAATTTTTTAAATATTGTATTAAAAAATTTATATTCAAGTATTAATTTTGAG**  
**AAAATAAAATGTATTGTTTTAGGGGGTCTGGTTTTTTTTAAAAATGATTTTTTTAGCTAT**  
**CTCTATGAAAAATCAGATATGAAGAATGATAAGAATATTCTCACATTAAAAAATAAATTT**  
**TTAATTGTAAAAACGTCTAATATTTTTAAAAATTTCTTTAAATGAAATATTAATGATGAA**  
**AATATGAAAAAACAATTTTTAACTTGAAAGTTGTATCACATGTGGATTTTTAAATAAAA**  
**TTTTATAAAAATTTTTGAAAAAATGAAGACAAAATTTGTTATGGTCCTGATGAAGTCAAA**  
**TATGCATCGAAAAATAAATGCTATAGATTCAATTATTAATAACTGATAAAAACGTTTAGAAGT**  
**TGTGATGTTAAAACTAGAAAAGGAATACGTTTCAGGTAGTACAATATGTAAAAAATACAGGA**  
**GGACAAGTTTATATTTTTTTCAGATAACCATACATCAGGTGAACAATTTAAATTCCTTAACA**  
**GGTATTGCAGCTATATTGAAGTTTCTATTTTTTATGATATTAATCAGGCACATGAAAAG**  
**GGCAATCTACAAAAGAAGATTATATTTAAAAGGGAAGATACACAAAAT**GGTGAGCATATG****  
**ACAAATATA**TGA**GTGAGAAATACATAATAATACATTATGTGCATATTACTTTTTTCACATA**  
**AAAATGATCCG**ATTAGTAATAATAATGTTTT**GAAAAAGAAAGAAGATAATTA**GAGCTCTG****  
**ACCATTTTATATA**TGCATAACAAAGTTGTTATA**TTATAAATATATAATAATTATTGTTAA**  
**TAATATGTGTAATTTGTTTATCATTATTATTTTTATAACACACACATATATATATATCTA**  
**TATATATATATATATATATATATATATATATAGATATAATATATATATGTTTAATCTTATAT**  
**TATATTTATTAATAACAAAAAATACATGGTTATTATTTTTAGCATTTTTATCATTTTTAACATT**  
**TTATCATTTTTATCAATTTTTTATTTTTTATTTTTATTTTTATTTGTTTTTGTATTTTTAAAAA**  
**TATCATAAATACGTATATATATTTATTTATGTATTTATTATTTTTATAATTTTTTTTTGTAT**  
**ATATAATTTTCGTGATAAAATATTAACCCCTCTTTCCACGTCTTACTTATGATATTGTTTA**  
**ATATTTTTTCAGTCGACCTTTTTATTTTTTATTTTTTAAATATATTGTATAAATTTTTAAATA**  
**ATCCTAATTTTTTTTTTTTTTTTTTTTTTAAACTTATAAGAACGAAATAAGTGTGTGCACATGT**  
**AACCACAAATCCAGTGCACAACAGTCTTATTTTATATTGAGCATTCTATTAATAAATAA**  
**AAATAATAATAAGTAAAAATAAATAAATAAATAAATAAATAAATAAATAAATAAATAAATA**  
**ATATATATATATATATATATATATATATATATATATATATATATATATATATATATATAT**  
**ATATATATATATATATATATATATATATATATATATATATATATATATATATATATATAT**  
**AAAAATTTTTATTATTAGGAAGAAAAGAAAAGAAAAGAAAAGAAAAGAAAAGAAAAGAAAAGAAA**  
**AAAAATTTTCA**

### gRNA primers

**clone1**  
**pelotagRNA1273F** TAAGTATATAATATT**AAAACATTATTATTACTAAAT**GTTTTAGAGCTAGAA  
**pelotagRNA1273R** TTCTAGCTCTAAAAC**ATTAGTAATAATAATGTTTT**AATATTATATACTTA  
**clone2**  
**pelotagRNA1314F** TAAGTATATAATATT**GAGCTCTGACCATTTTATAT**GTTTTAGAGCTAGAA  
**pelotagRNA1314R** TTCTAGCTCTAAAAC**ATATAAAATGGTCAGAGCTC**AATATTATATACTTA

### XhoI For Pelota (LH)

gtgacactatagaactcgag**GAGCTCTGACCATTTTATATATGCATAACAAAGTTGTATATTATAAATATA**  
 cgcgccttaagctca

### AflIII Pelota For

**ATGTGAACCACTTAGATTTATTTCAGGTGcttaagCAACAATTATATAAAAACAGTTTTTAG**

### AflIII Pelota Rev

**CTAAAAACTGTTTTATATAATGTGGcttaagCACCTGAATAAATCTAAGTGGTTCACAT**

### AvrII NeonGreen Pelota Rev (RH)

ctccacttcccctagg**TATATTTGTCATATGCTCACC**

### AvrII 3xHA Pelota Rev (RH)

CGTACGGGTAcctagg**TATATTTGTCATATGCTCACC**

**Supplementary Figure 9.** Scheme of CRISPR/Cas9 engineering of *P. falciparum* Pelo (PF3D7\_0722100 gene; human Pelo homolog). Two sets of gRNAs creating clone 1 and clone 2 (red) were used to create independent clones 1 and 2. Recombined sections of *PfPelo* gene are indicated in purple and gray, respectively. Primers used for creation of recombinant DNA and target sequences of gRNAs are indicated in teal, yellow and red, respectively.

## Supplementary Figure 10.

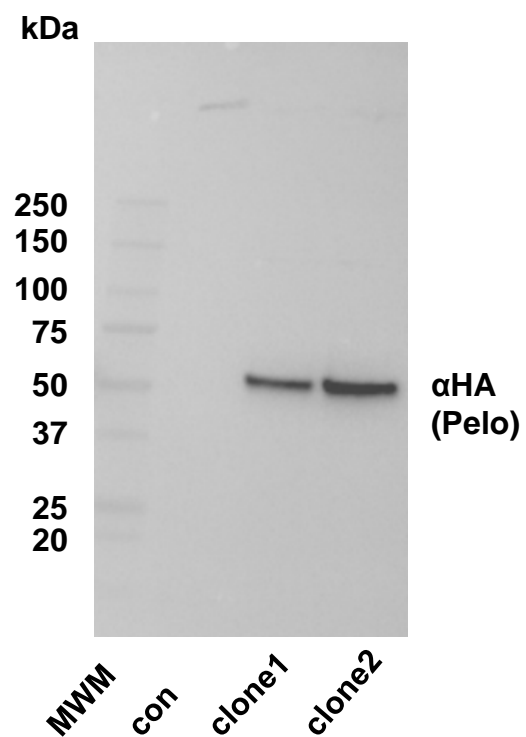

**Supplementary Figure 10.** Western blot analysis of endogenous HA-tagged *PfPelo* protein from two Cas9 engineered clonal lines (Clone 1 and Clone 2) of *P. falciparum* Dd2 cells. Control (con) represents non-engineered *P. falciparum* Dd2 parent line. Biorad Precision Plus Protein™ molecular weight markers (MWM) are indicated.

## Supplementary Figure 11.

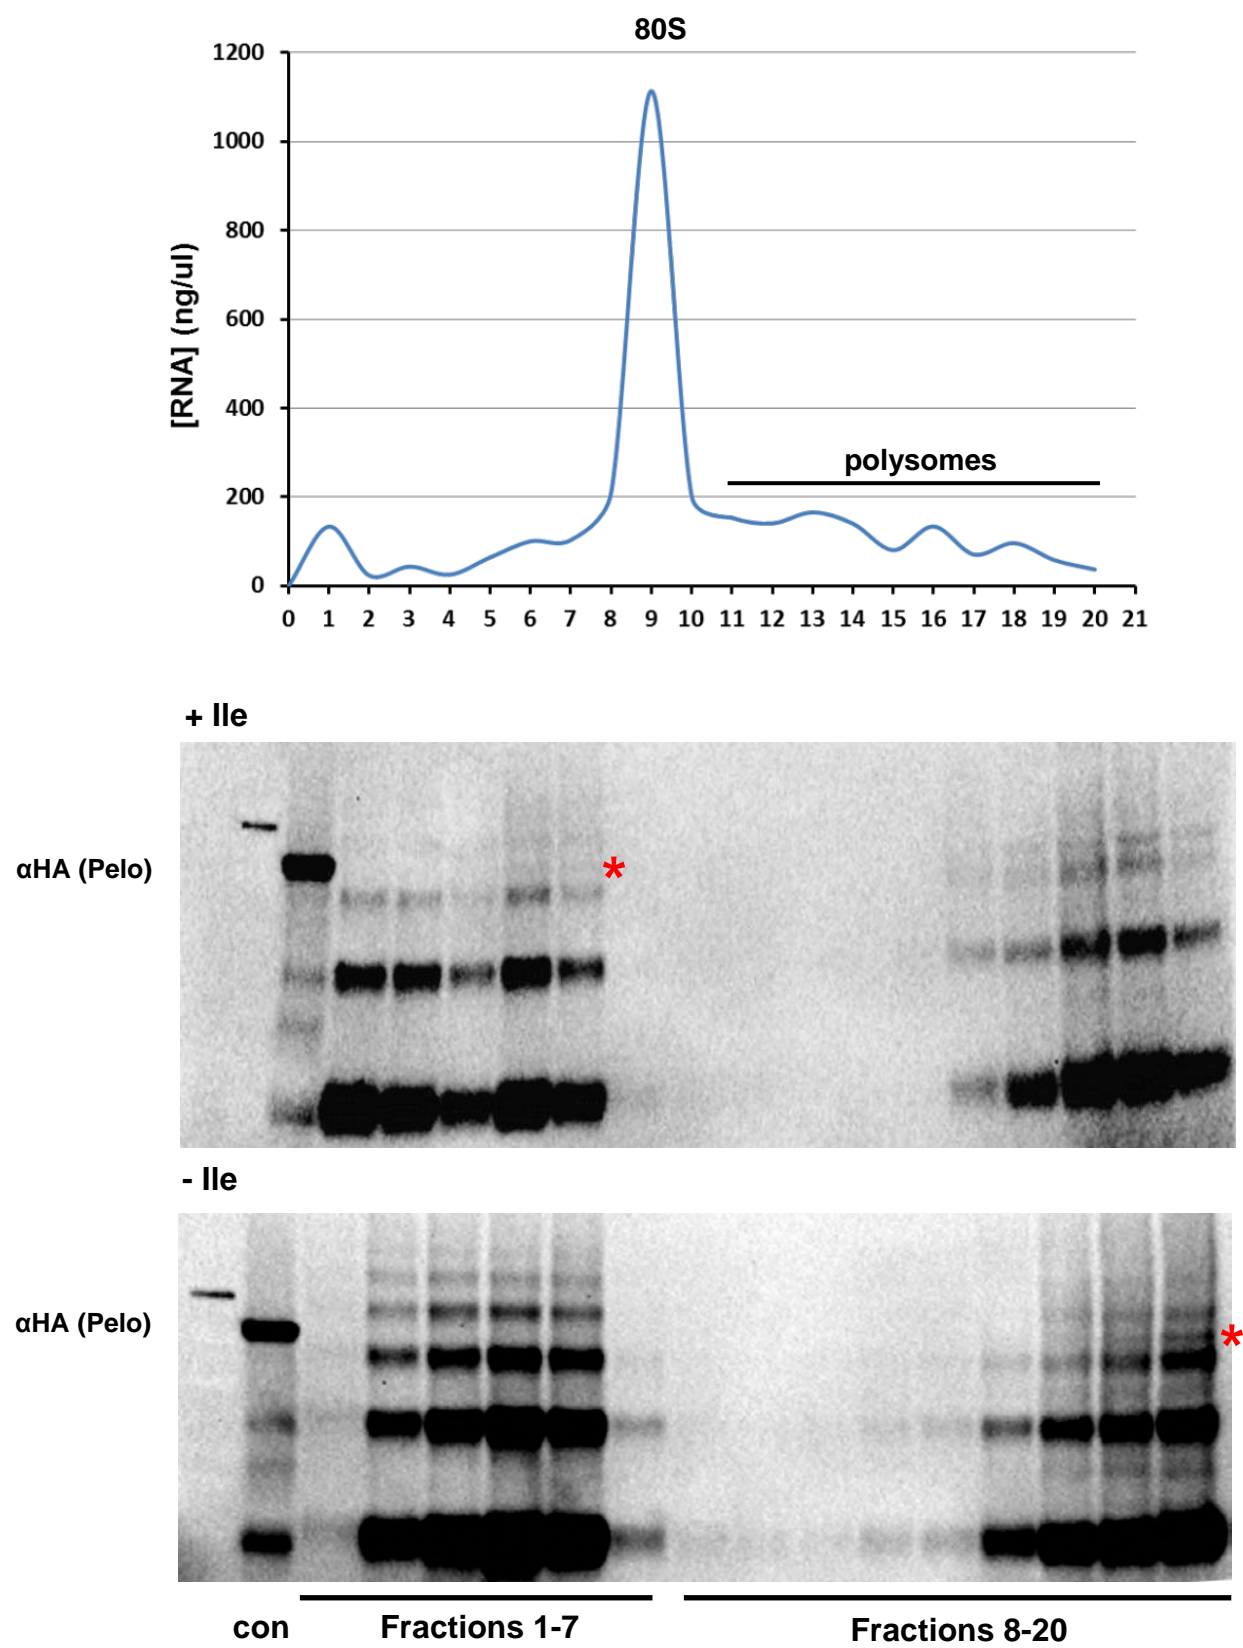

**Supplementary Figure 11.** Polysome profile analysis of isoleucine starved (-Ile) and control (+Ile) parasites. Star (\*) indicates shift in endogenous HA-Pelo distribution into polysome fractions during 48 hour Ile starvation.

## Supplementary Figure 12.

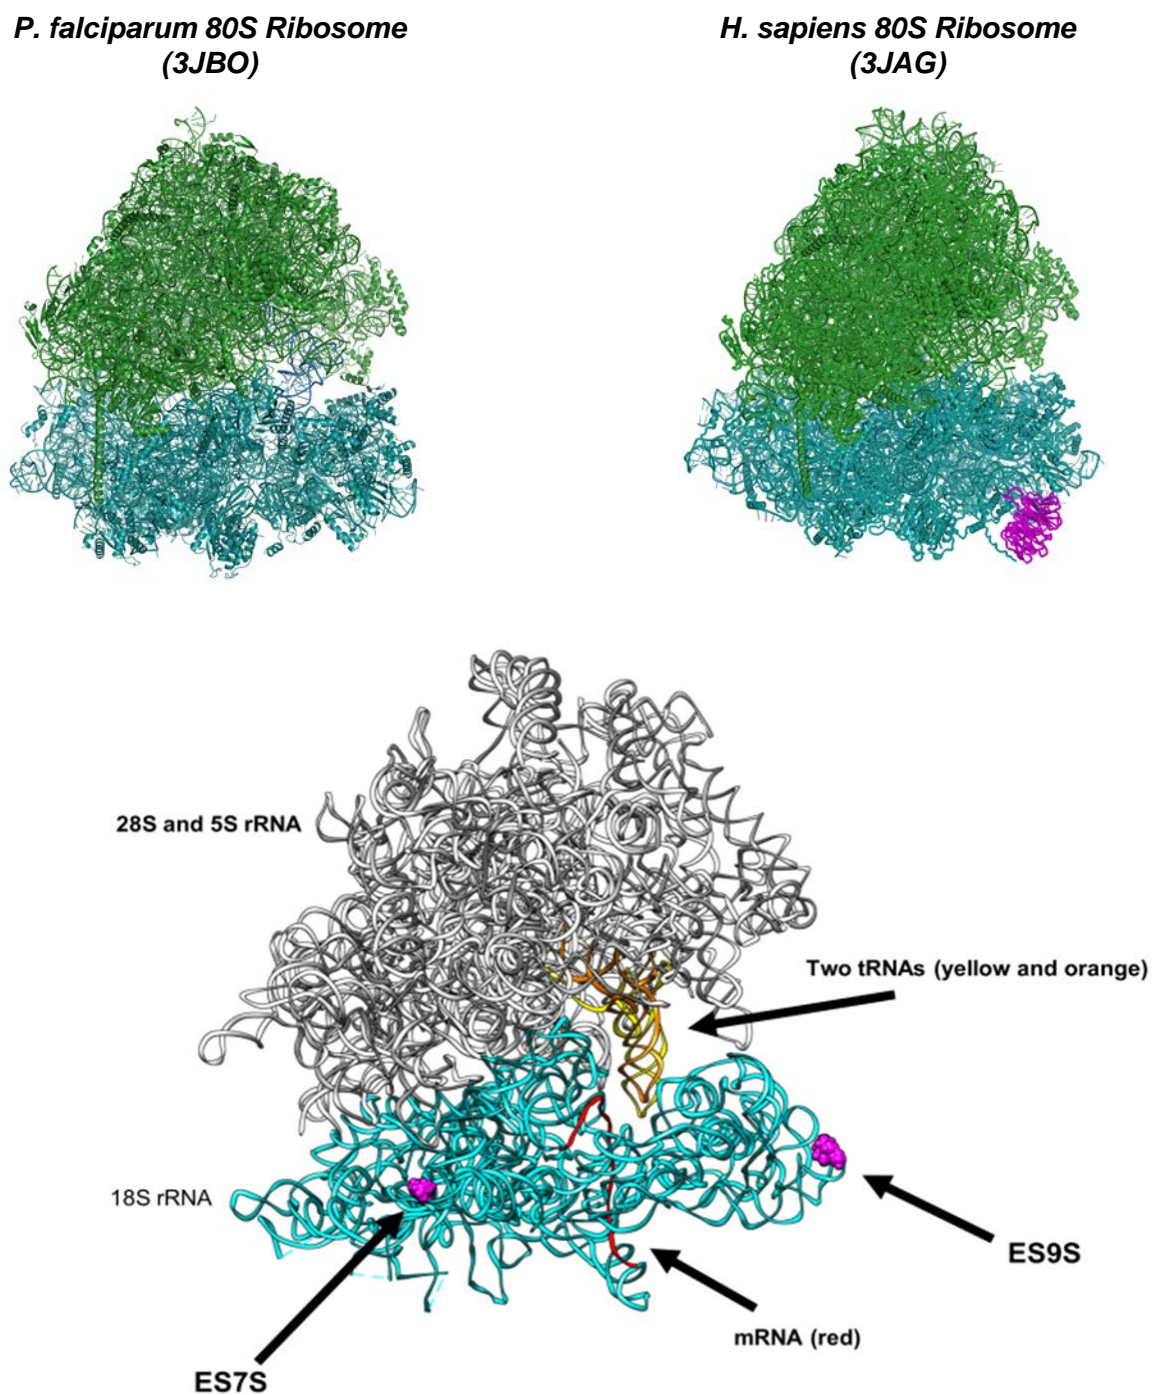

**Supplementary Figure 12.** Structure of *P. falciparum* (PDB code: 3JBO) and *H. sapiens* (PDB code: 3JAG) ribosomes with receptor for activated kinase C (RACK1) in magenta, previously shown to be absent from *Plasmodium* ribosomes (60S in green, 40S in cyan). Lower: Model of *P. falciparum* ribosome displaying small subunit ribosomal RNA sequence extensions (28S and 5S rRNAs in gray, 18S rRNA in cyan, tRNAs in yellow and orange, mRNA in red, extended sequences ES7S and ES9S in magenta). The ES7S and ES9S regions distinguish *P. falciparum* from other organisms. ES7S is located next to the binding pocket for ribosome GTPases and is adjacent to ribosome GTPase center.

### Supplementary Figure 13.

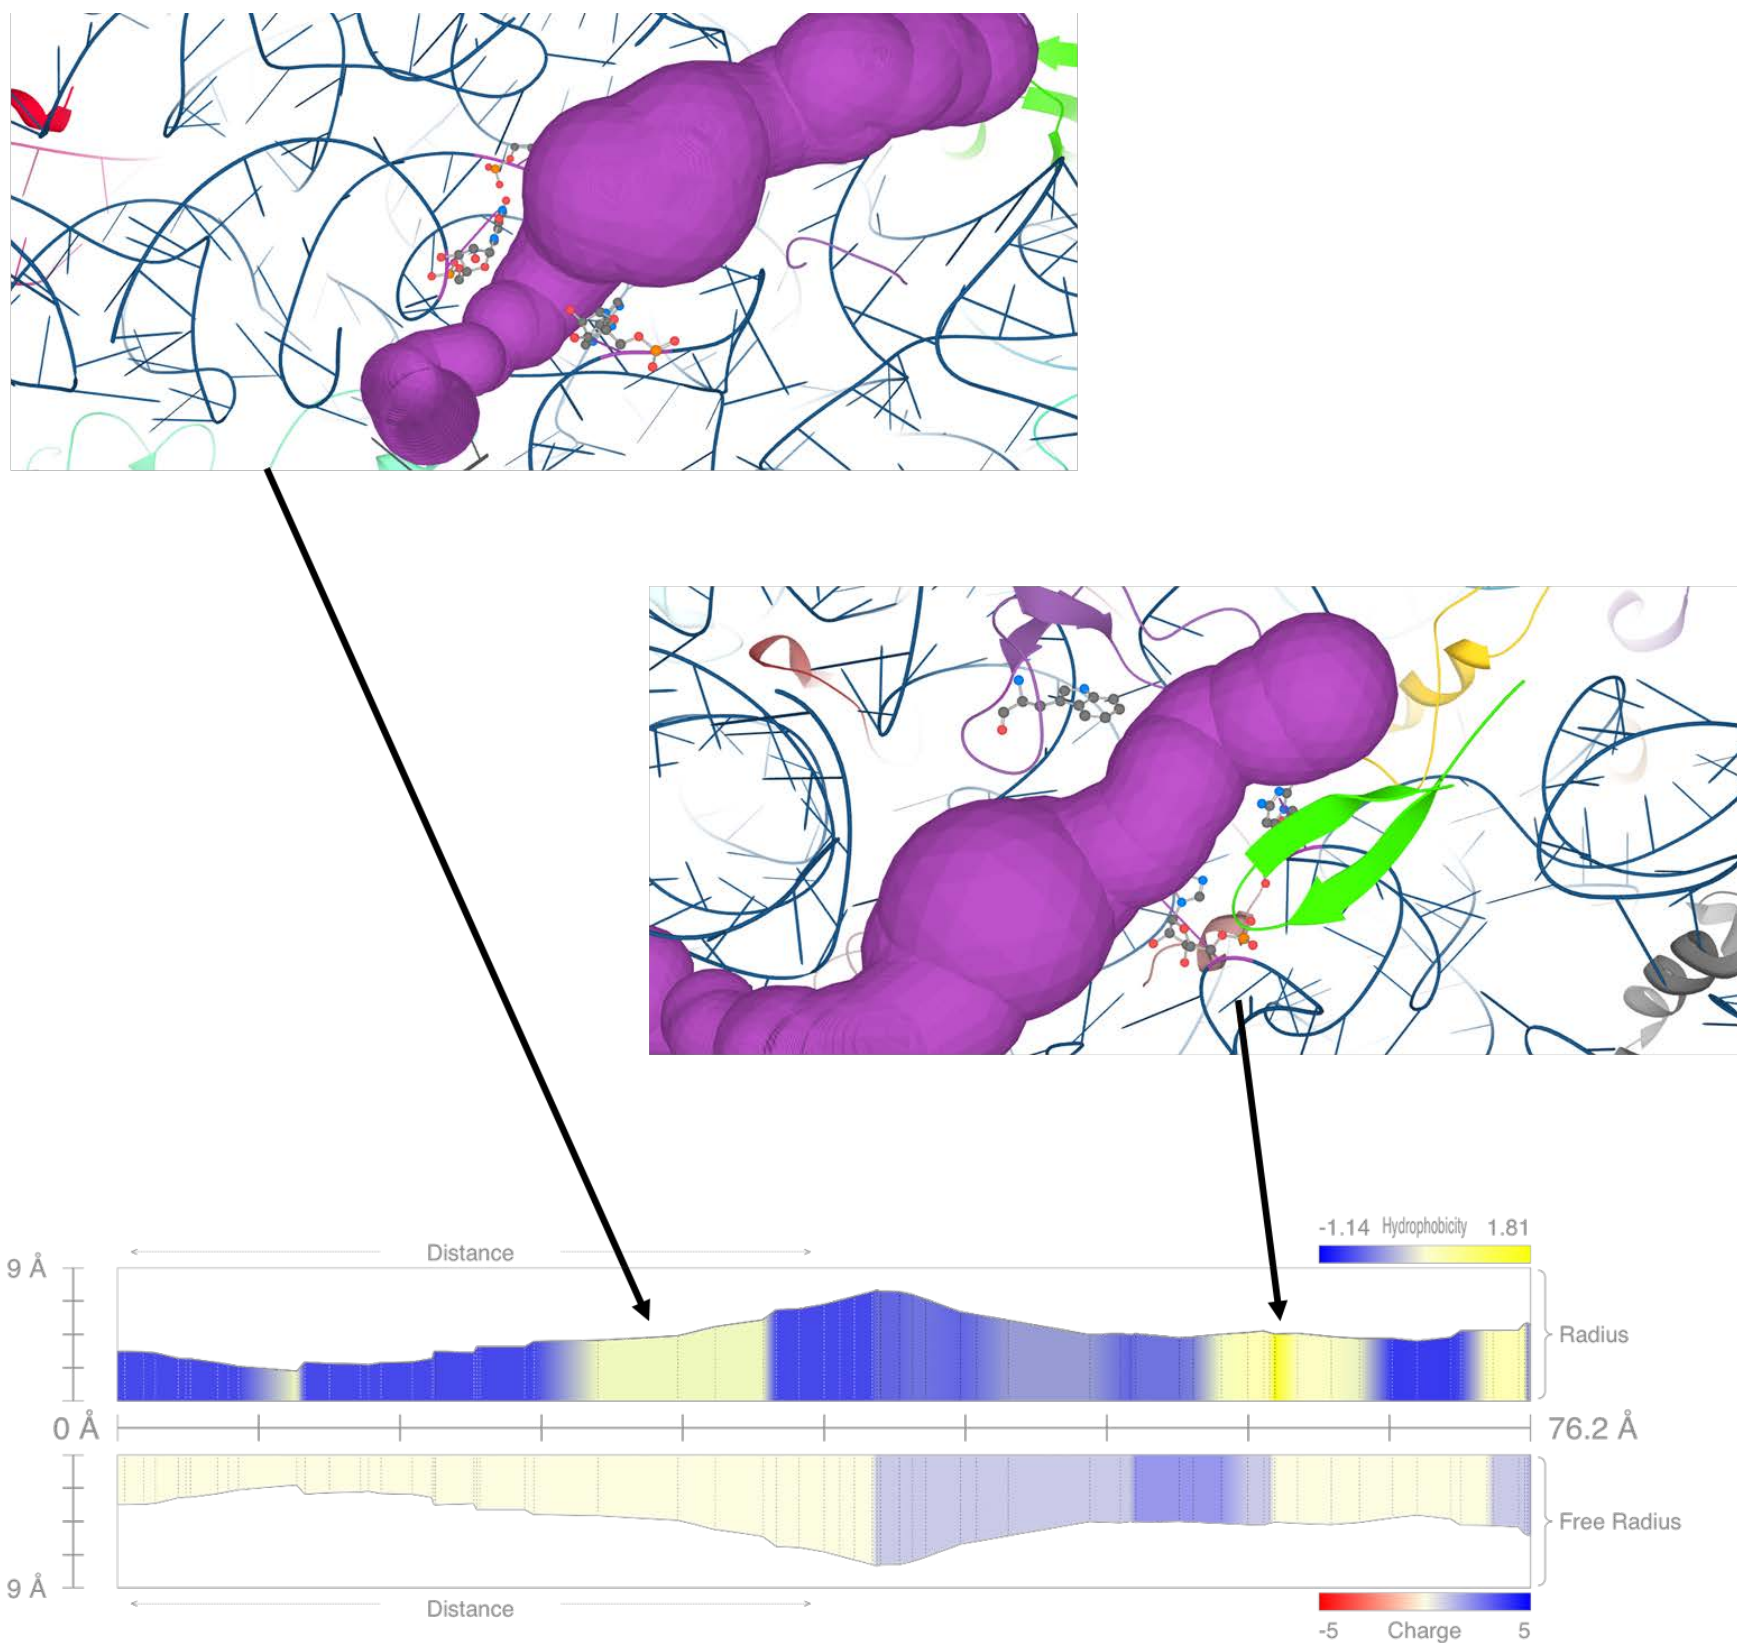

**Supplementary Figure 13.** Polypeptide exit channel from human ribosome (PDB: 6d90) has two long fragments (over 10 Angstroms) of relatively hydrophobic lining of the tunnel. Two major hydrophobic patches observed in other organisms are rRNA flanked (upper panel, interacting molecules have atoms shown) and L22 and L4 flanked (lower panel).

## Supplementary Figure 14.

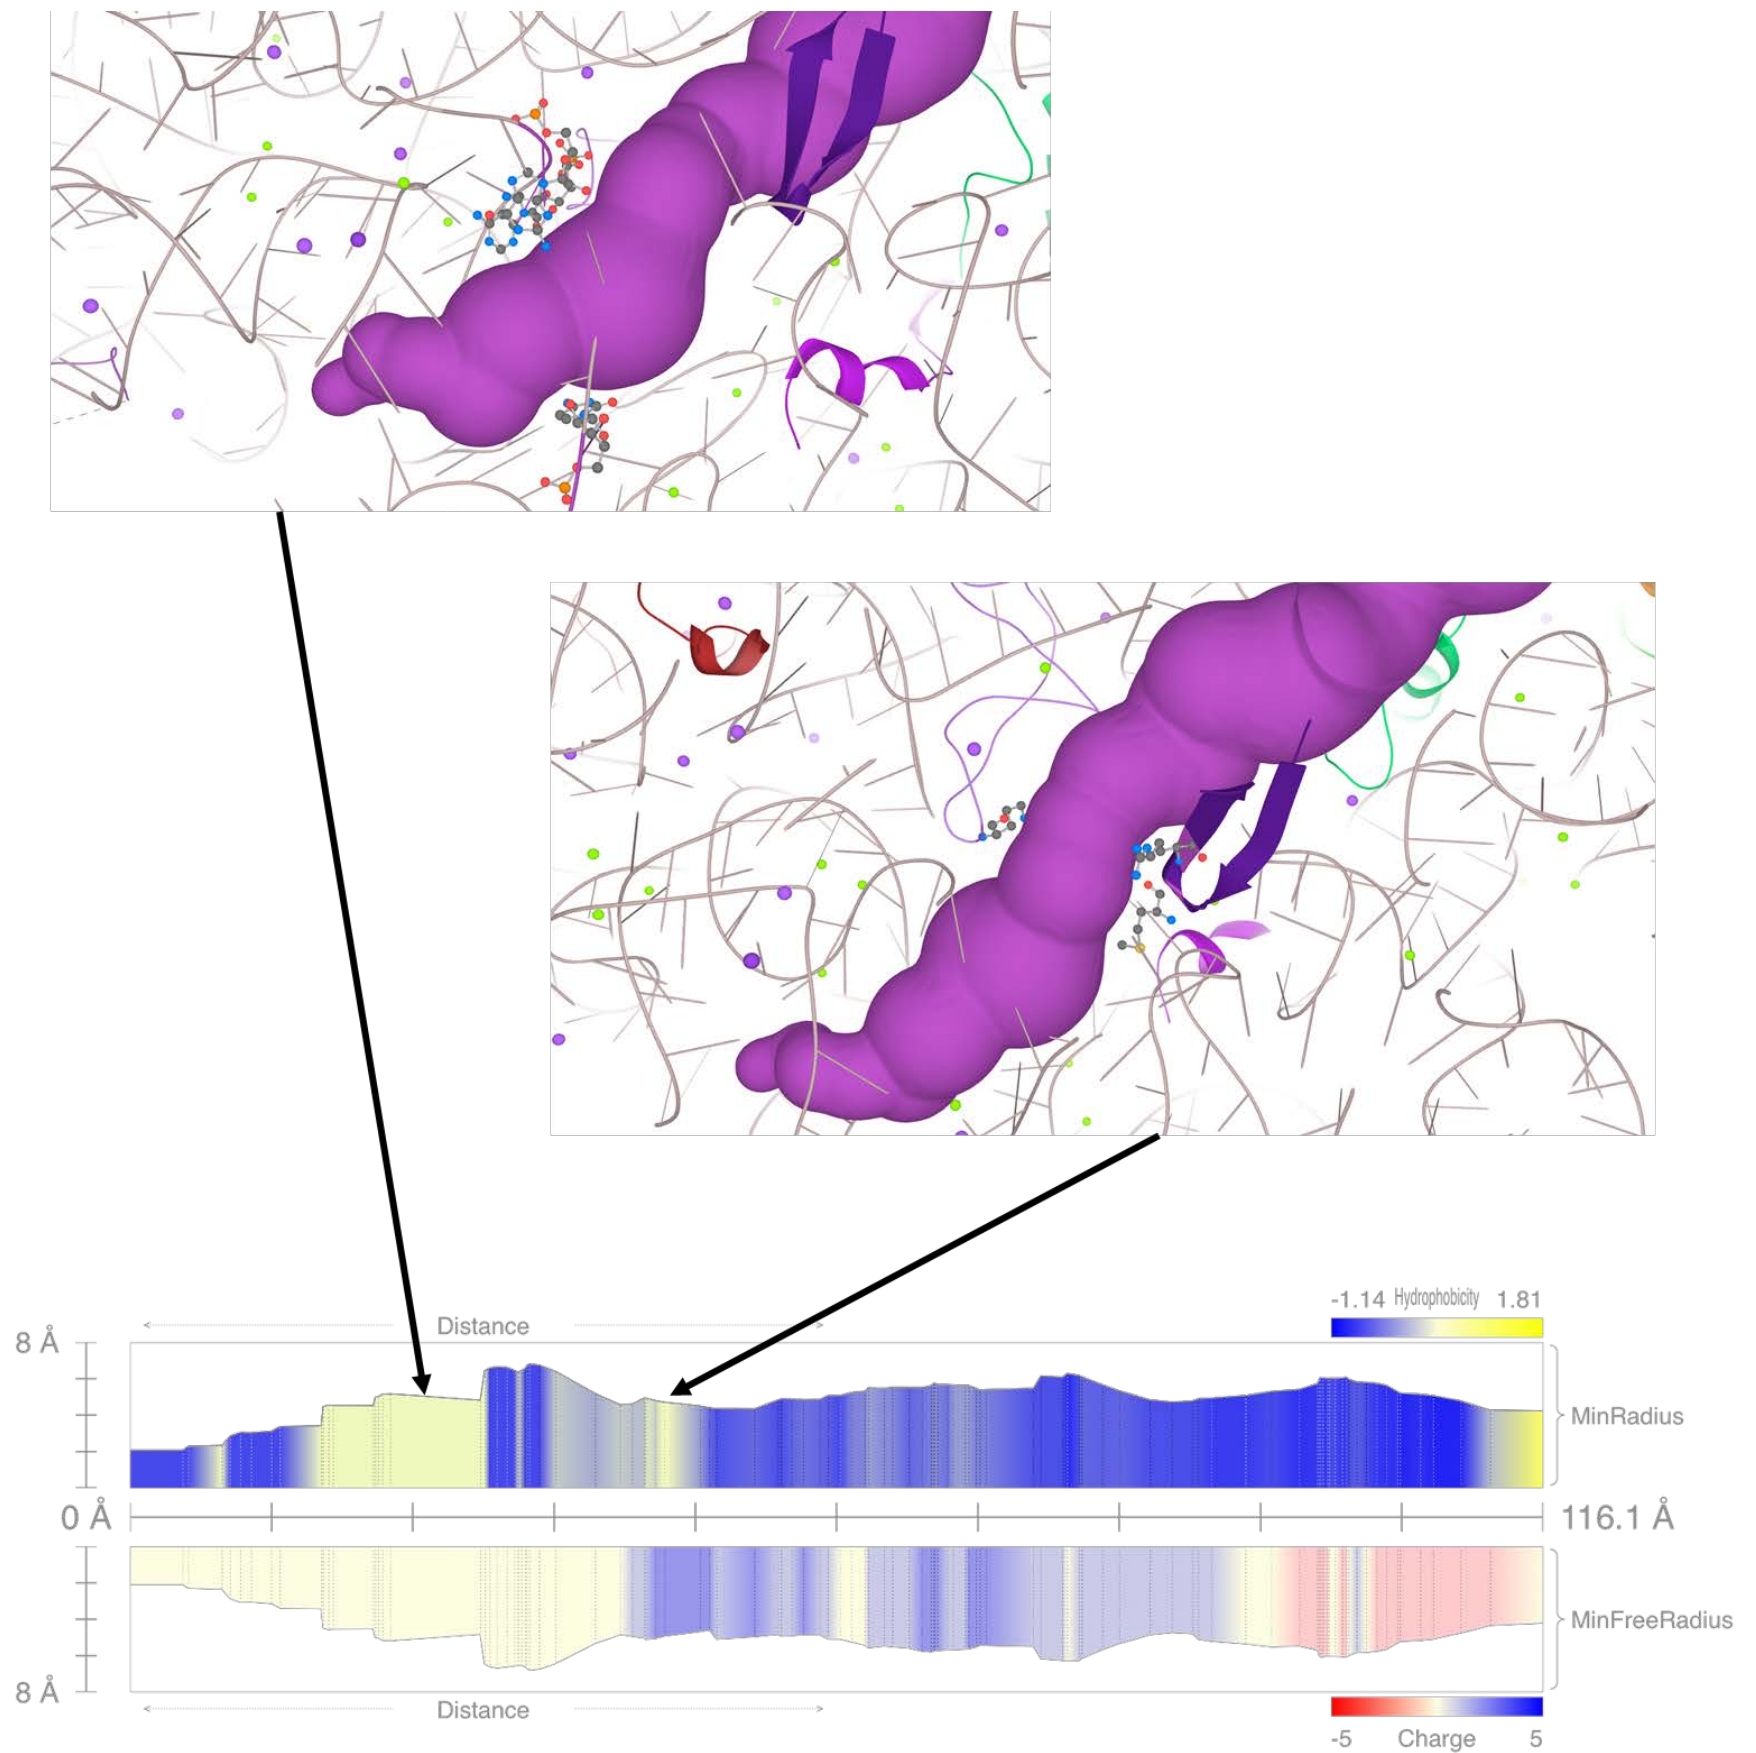

**Supplementary Figure 14.** Polypeptide exit channel from *Haloarcula marismortui* ribosome (PDB: 1jj2) has one long fragment (over 10 Angstroms) of relatively hydrophobic lining of the tunnel. Two major hydrophobic patches observed in other organisms are rRNA flanked (upper panel, interacting molecules have atoms shown) and L22 and L4 flanked (lower panel).

## Supplementary Figure 15.

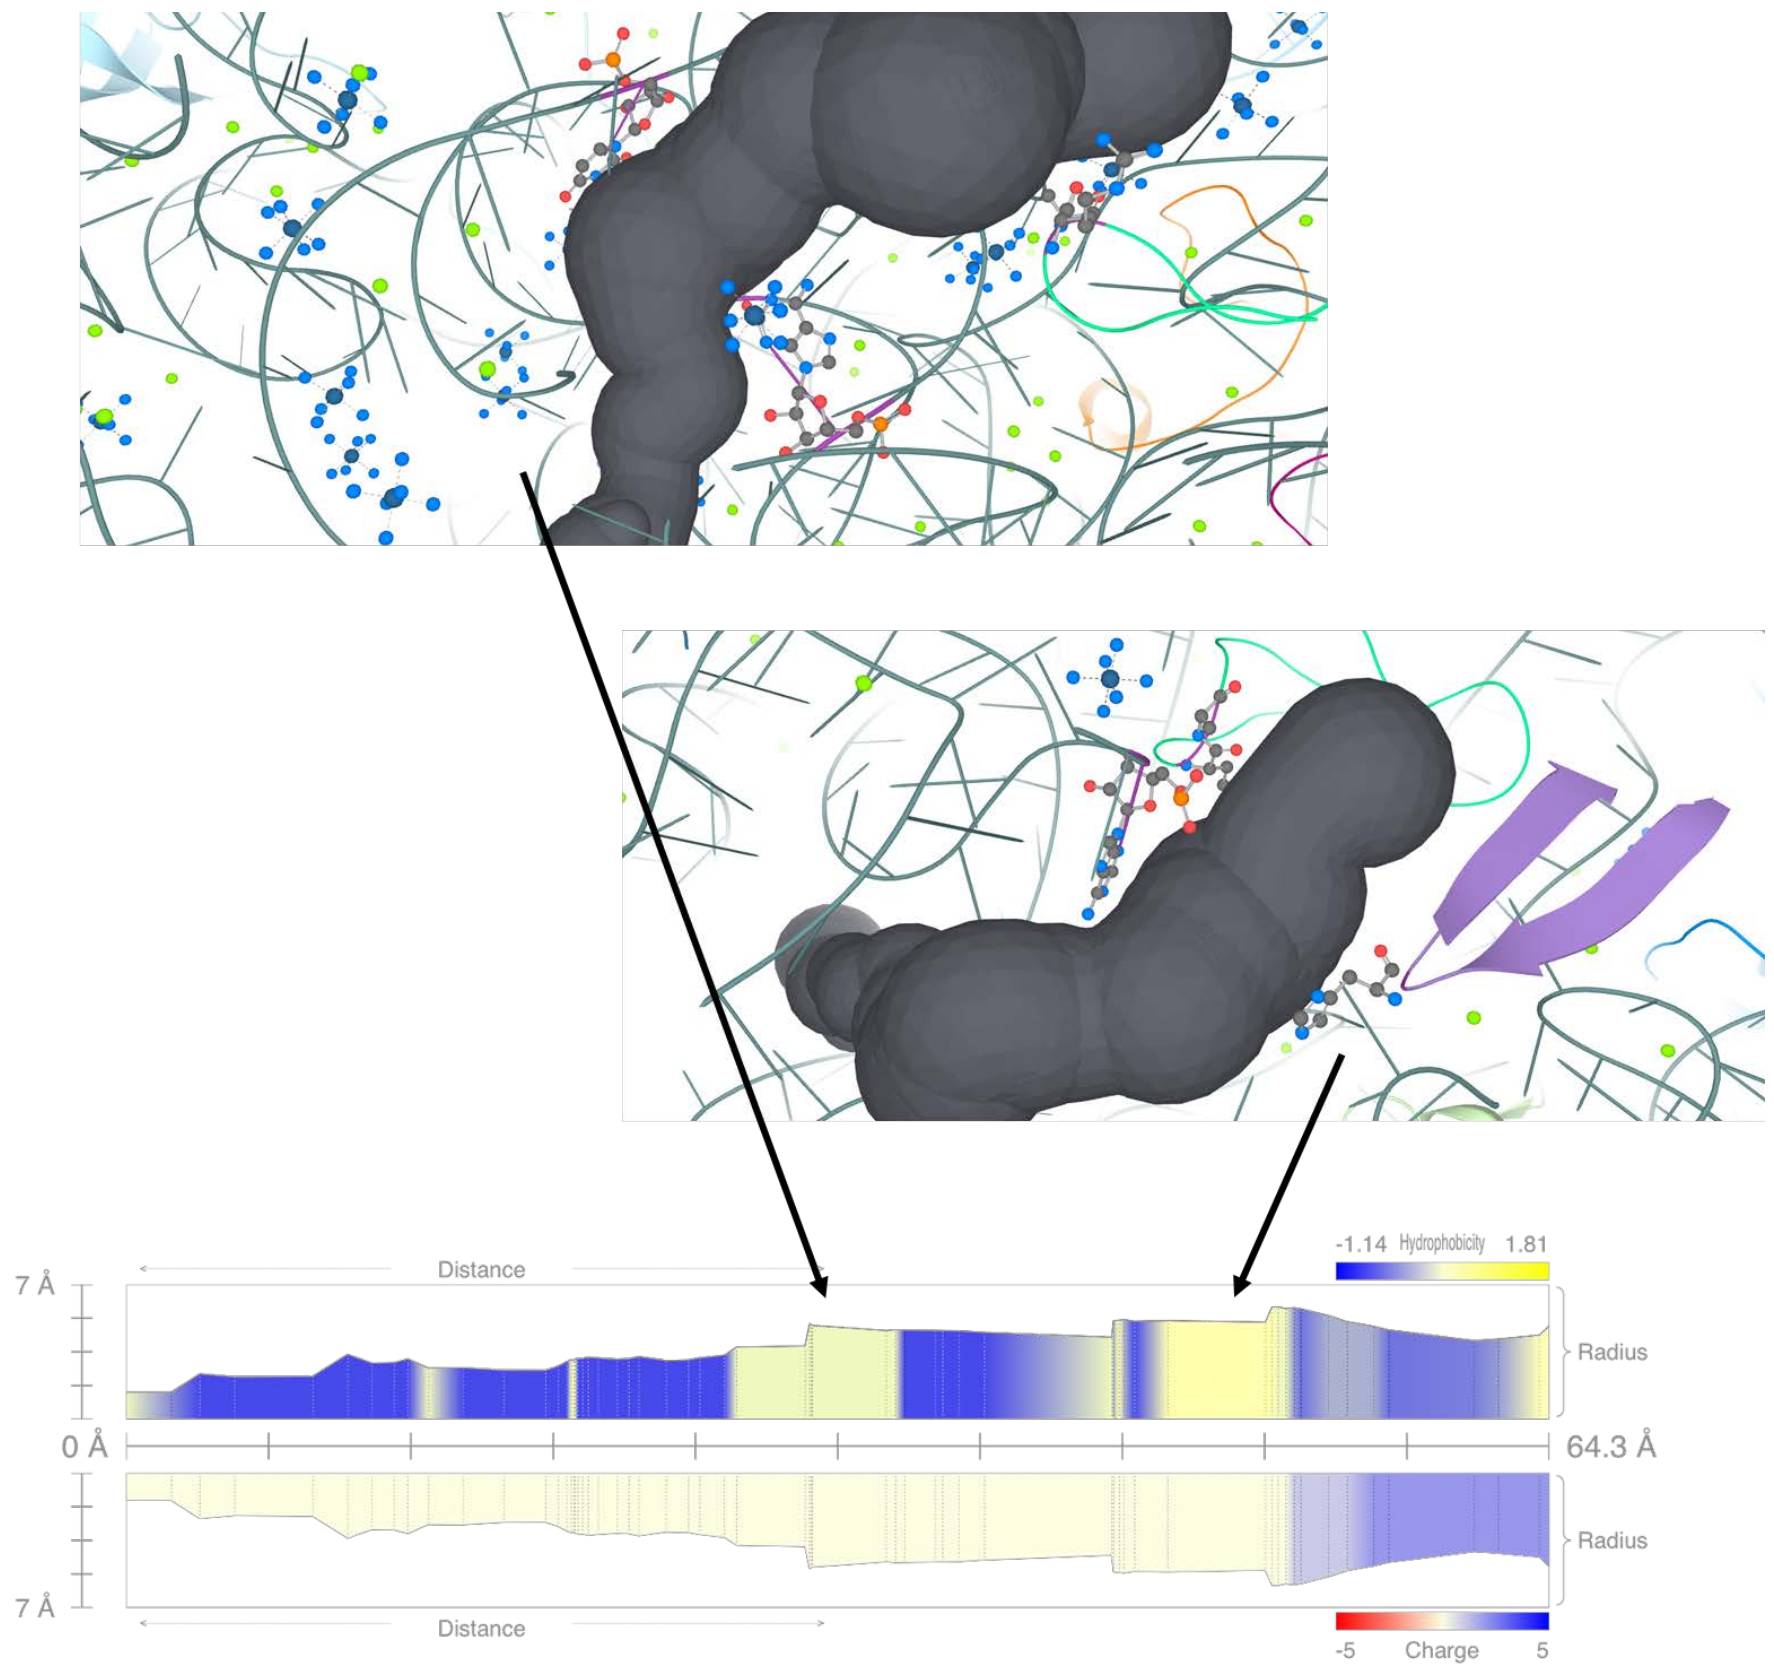

**Supplementary Figure 15.** Polypeptide exit channel from yeast ribosome (PDB: 5fci) has two long fragments (over 10 Angstroms) of relatively hydrophobic lining of the tunnel. Two major hydrophobic patches observed in other organisms are rRNA flanked (upper panel, interacting molecules have atoms shown) and L22 and L4 flanked (lower panel).



## Supplementary Table 2.

| ID         | Name                                                                                         | Bgd count | Result count | Pct of bgd | Fold enrichment | Odds ratio | P-value   | Benjamini  | Bonferroni |
|------------|----------------------------------------------------------------------------------------------|-----------|--------------|------------|-----------------|------------|-----------|------------|------------|
| GO:0044419 | interspecies interaction between organisms                                                   | 335       | 72           | 21,5       | 5,36            | 10,05      | 1,86E-36  | 8,28E-35   | 1,66E-34   |
| GO:0044403 | symbiosis, encompassing mutualism through parasitism                                         | 335       | 72           | 21,5       | 5,36            | 10,05      | 1,86E-36  | 8,28E-35   | 1,66E-34   |
| GO:0051704 | multi-organism process                                                                       | 381       | 75           | 19,7       | 4,91            | 9,15       | 2,44E-35  | 7,23E-34   | 2,17E-33   |
| GO:0020013 | modulation by symbiont of host erythrocyte aggregation                                       | 190       | 51           | 26,8       | 6,69            | 11,71      | 4,20E-30  | 4,68E-29   | 3,74E-28   |
| GO:0034118 | regulation of erythrocyte aggregation                                                        | 190       | 51           | 26,8       | 6,69            | 11,71      | 4,20E-30  | 4,68E-29   | 3,74E-28   |
| GO:0034110 | regulation of homotypic cell-cell adhesion                                                   | 190       | 51           | 26,8       | 6,69            | 11,71      | 4,20E-30  | 4,68E-29   | 3,74E-28   |
| GO:0030155 | regulation of cell adhesion                                                                  | 190       | 51           | 26,8       | 6,69            | 11,71      | 4,20E-30  | 4,68E-29   | 3,74E-28   |
| GO:0022407 | regulation of cell-cell adhesion                                                             | 190       | 51           | 26,8       | 6,69            | 11,71      | 4,20E-30  | 4,68E-29   | 3,74E-28   |
| GO:0044068 | modulation by symbiont of host cellular process                                              | 192       | 51           | 26,6       | 6,62            | 11,54      | 7,35E-30  | 7,27E-29   | 6,54E-28   |
| GO:0044003 | modification by symbiont of host morphology or physiology                                    | 193       | 51           | 26,4       | 6,58            | 11,46      | 9,70E-30  | 7,84E-29   | 8,63E-28   |
| GO:0051817 | modification of morphology or physiology of other organism involved in symbiotic interaction | 193       | 51           | 26,4       | 6,58            | 11,46      | 9,70E-30  | 7,84E-29   | 8,63E-28   |
| GO:0035821 | modification of morphology or physiology of other organism                                   | 194       | 51           | 26,3       | 6,55            | 11,38      | 1,28E-29  | 9,47E-29   | 1,14E-27   |
| GO:0020033 | antigenic variation                                                                          | 204       | 49           | 24         | 5,99            | 9,91       | 1,93E-26  | 1,22E-25   | 1,71E-24   |
| GO:0051809 | passive evasion of immune response of other organism involved in symbiotic interaction       | 204       | 49           | 24         | 5,99            | 9,91       | 1,93E-26  | 1,22E-25   | 1,71E-24   |
| GO:0043207 | response to external biotic stimulus                                                         | 206       | 49           | 23,8       | 5,93            | 9,78       | 3,12E-26  | 1,26E-25   | 2,78E-24   |
| GO:0051832 | avoidance of defenses of other organism involved in symbiotic interaction                    | 206       | 49           | 23,8       | 5,93            | 9,78       | 3,12E-26  | 1,26E-25   | 2,78E-24   |
| GO:0051707 | response to other organism                                                                   | 206       | 49           | 23,8       | 5,93            | 9,78       | 3,12E-26  | 1,26E-25   | 2,78E-24   |
| GO:0051834 | evasion or tolerance of defenses of other organism involved in symbiotic interaction         | 206       | 49           | 23,8       | 5,93            | 9,78       | 3,12E-26  | 1,26E-25   | 2,78E-24   |
| GO:0051807 | evasion or tolerance of defense response of other organism involved in symbiotic interaction | 206       | 49           | 23,8       | 5,93            | 9,78       | 3,12E-26  | 1,26E-25   | 2,78E-24   |
| GO:0052173 | response to defenses of other organism involved in symbiotic interaction                     | 206       | 49           | 23,8       | 5,93            | 9,78       | 3,12E-26  | 1,26E-25   | 2,78E-24   |
| GO:0052564 | response to immune response of other organism involved in symbiotic interaction              | 206       | 49           | 23,8       | 5,93            | 9,78       | 3,12E-26  | 1,26E-25   | 2,78E-24   |
| GO:0051805 | evasion or tolerance of immune response of other organism involved in symbiotic interaction  | 206       | 49           | 23,8       | 5,93            | 9,78       | 3,12E-26  | 1,26E-25   | 2,78E-24   |
| GO:0009607 | response to biotic stimulus                                                                  | 207       | 49           | 23,7       | 5,9             | 9,71       | 3,97E-26  | 1,54E-25   | 3,53E-24   |
| GO:0009605 | response to external stimulus                                                                | 214       | 49           | 22,9       | 5,71            | 9,29       | 2,04E-25  | 7,55E-25   | 1,81E-23   |
| GO:0065008 | regulation of biological quality                                                             | 263       | 51           | 19,4       | 4,83            | 7,55       | 6,61E-23  | 2,35E-22   | 5,88E-21   |
| GO:0051701 | interaction with host                                                                        | 285       | 51           | 17,9       | 4,46            | 6,8        | 3,10E-21  | 1,06E-20   | 2,76E-19   |
| GO:0016337 | single organismal cell-cell adhesion                                                         | 57        | 23           | 40,4       | 10,06           | 18,32      | 3,18E-18  | 1,01E-17   | 2,83E-16   |
| GO:0098602 | single organism cell adhesion                                                                | 57        | 23           | 40,4       | 10,06           | 18,32      | 3,18E-18  | 1,01E-17   | 2,83E-16   |
| GO:0007155 | cell adhesion                                                                                | 77        | 23           | 29,9       | 7,44            | 11,48      | 7,28E-15  | 2,23E-14   | 6,48E-13   |
| GO:0009405 | pathogenesis                                                                                 | 101       | 25           | 24,8       | 6,17            | 8,93       | 5,70E-14  | 1,69E-13   | 5,07E-12   |
| GO:0044406 | adhesion of symbiont to host                                                                 | 165       | 30           | 18,2       | 4,53            | 6,15       | 9,42E-13  | 2,62E-12   | 8,39E-11   |
| GO:0020035 | cytoadherence to microvasculature, mediated by symbiont protein                              | 165       | 30           | 18,2       | 4,53            | 6,15       | 9,42E-13  | 2,62E-12   | 8,39E-11   |
| GO:0022610 | biological adhesion                                                                          | 192       | 31           | 16,1       | 4,02            | 5,33       | 1,01E-11  | 2,72E-11   | 8,98E-10   |
| GO:0050896 | response to stimulus                                                                         | 475       | 50           | 10,5       | 2,62            | 3,48       | 4,27E-11  | 1,12E-10   | 3,80E-09   |
| GO:0050794 | regulation of cellular process                                                               | 516       | 51           | 9,9        | 2,46            | 3,24       | 2,72E-10  | 6,93E-10   | 2,43E-08   |
| GO:0050789 | regulation of biological process                                                             | 541       | 51           | 9,4        | 2,35            | 3,05       | 1,53E-09  | 3,78E-09   | 1,36E-07   |
| GO:0065007 | biological regulation                                                                        | 564       | 51           | 9          | 2,25            | 2,9        | 6,70E-09  | 1,61E-08   | 5,96E-07   |
| GO:0006468 | protein phosphorylation                                                                      | 109       | 10           | 9,2        | 2,29            | 2,5        | 0,0114981 | 0,02692976 | 1          |

**Supplementary Table 1.** Highly significant gene ontology terms (GO) from biological process category for exported genes in *Plasmodium falciparum* (197 genes in total).

## Supplementary Figure 16.

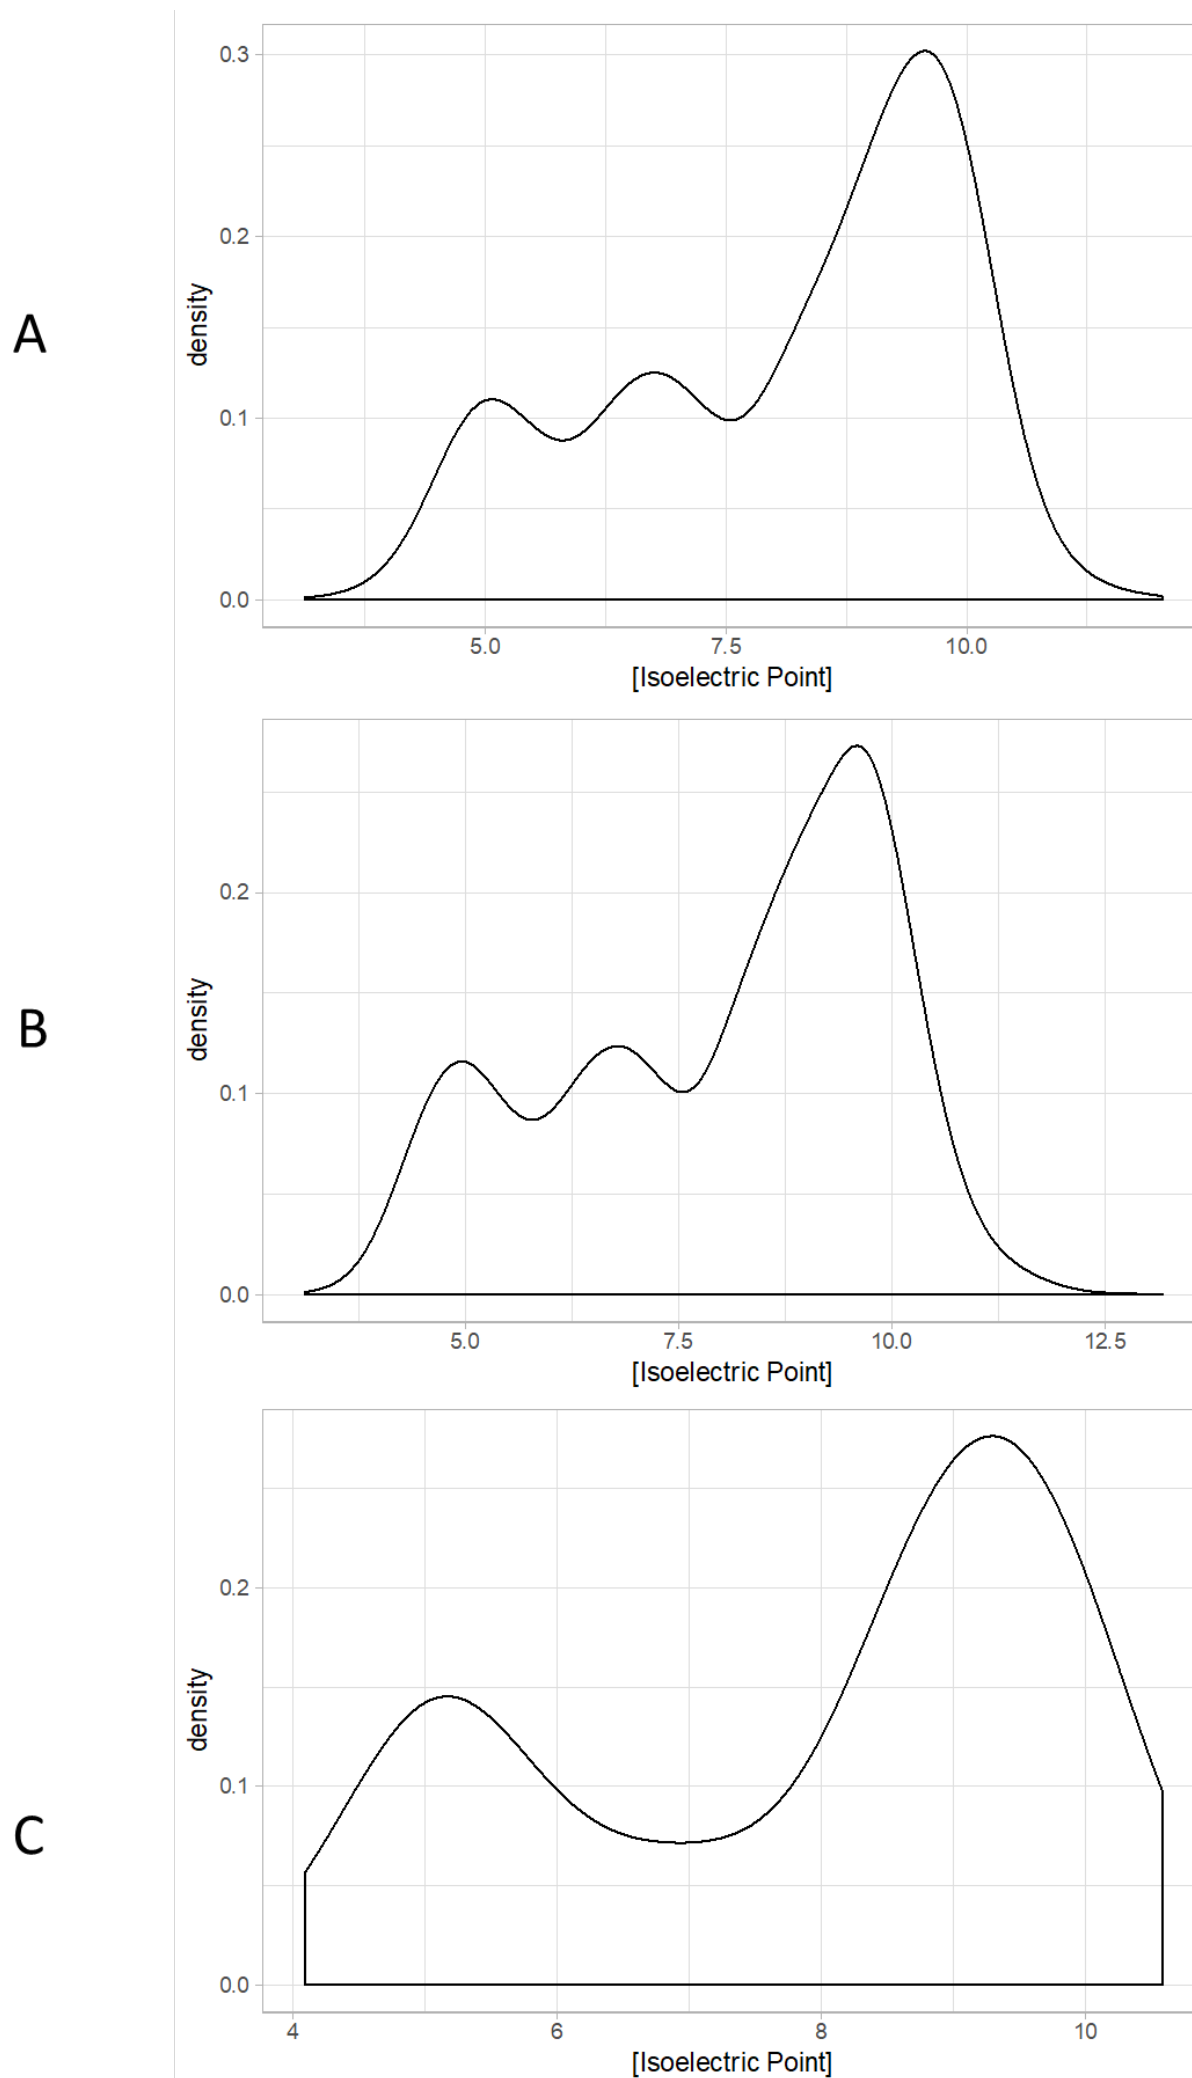

**Supplementary Figure 16.** Comparison of density plots of isoelectric points of proteins encoded by **A.** polyA-carrying genes in *P. falciparum* (3416 in total), **B.** all *P. falciparum* proteins (5801 in total) and **C.** exported proteins. All distributions do not differ significantly ( $p$ -value of Kolmogorov-Smirnov test for comparisons: A-B 0.12, A-C 0.06, B-C 0.23).

Supplementary Figure 17.

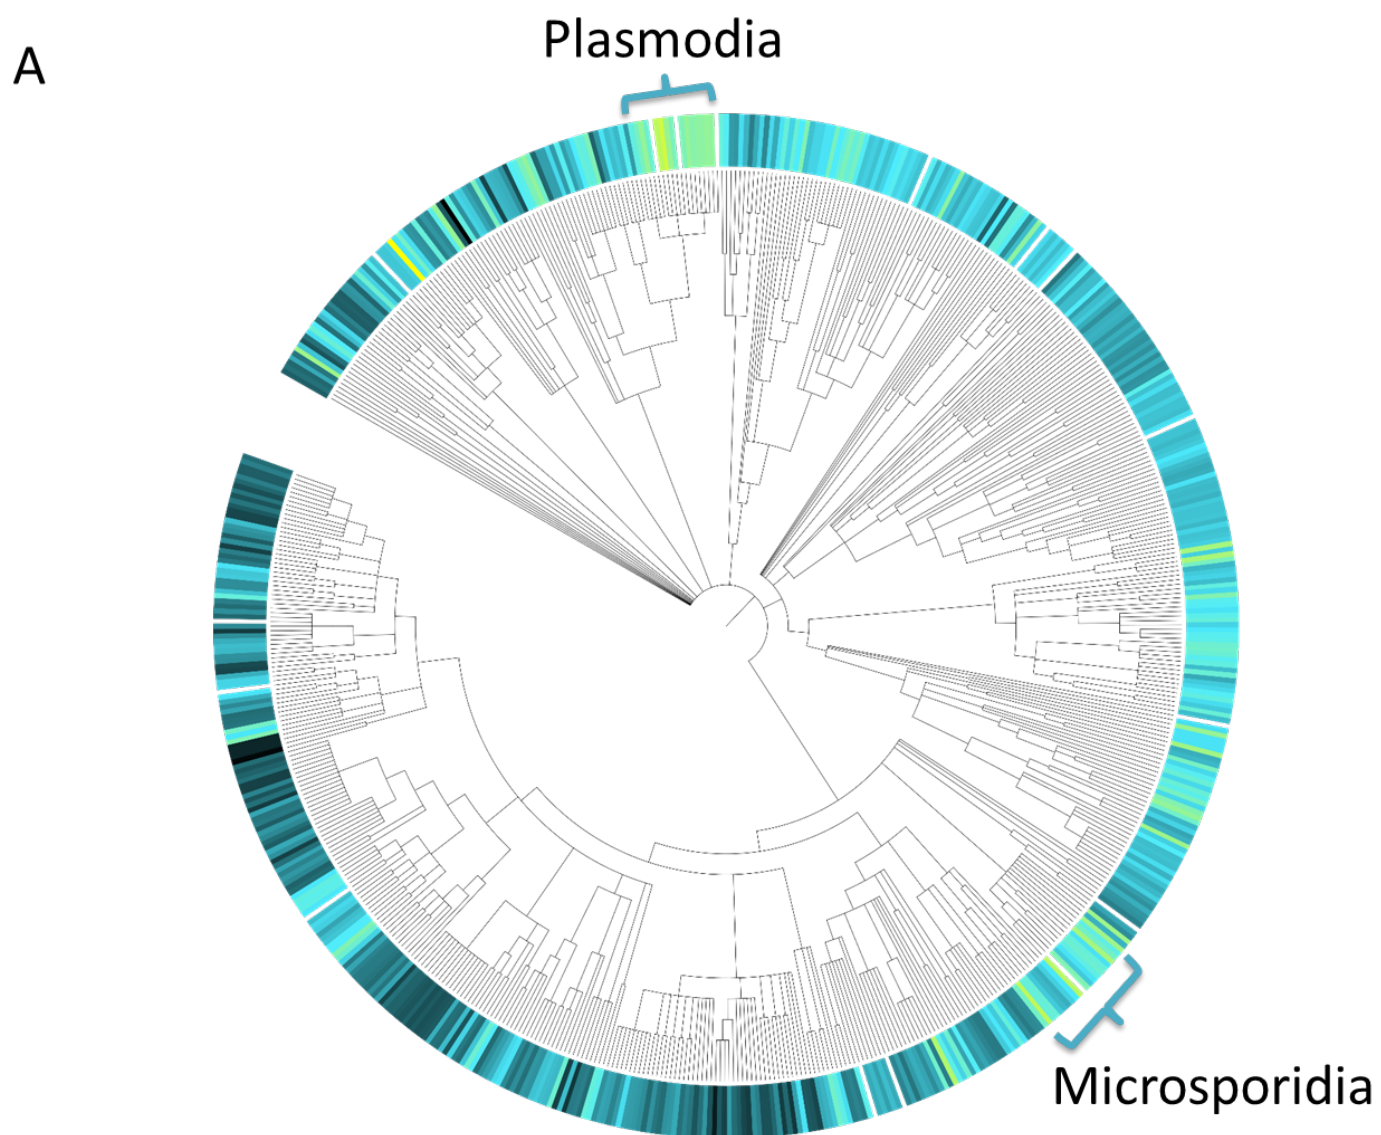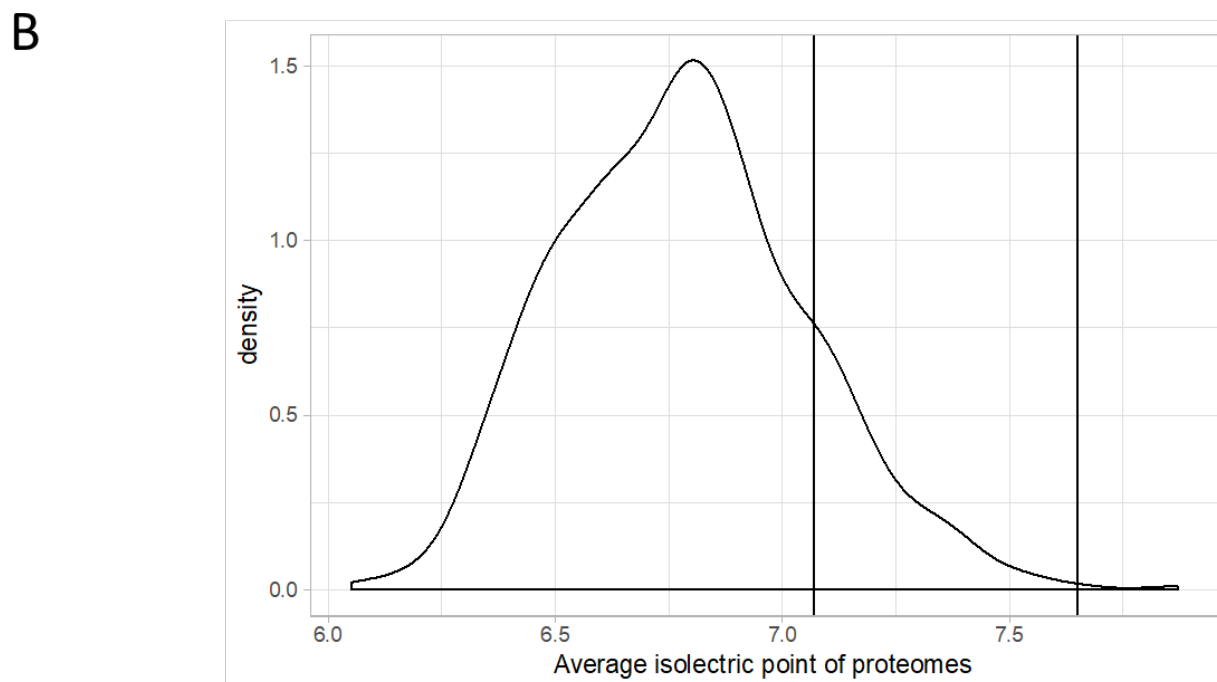

**Supplementary Figure 17. A.** Distribution of average isoelectric point mapped onto taxonomic tree of eukaryotes. *Plasmodia* and certain *Microsporidia* are the only two taxonomic groups consistently having high mean pI of proteomes. **B.** Density plot of the values from above plot. Range in which fit all *Plasmodium* species marked with vertical lines.
